# Supplementary material for: Heterocyclic Compounds as Synthetic Tyrosinase Inhibitors: Recent Advances
Source: MDPI journal article supplement (doi:10.3390/ijms24109097), 2023-05-22
Supplement: s1 [file s1]

**Table S1.** Carbazole derivatives, see **Figure 3** (TYRIs bearing the carbazole scaffold).

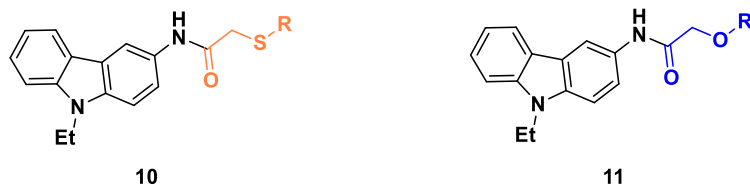

| Compound                | R               | K <sub>i</sub> (μM ± SEM) |
|-------------------------|-----------------|---------------------------|
| <b>10a</b>              | 2-benzimidazole | 1.64                      |
| <b>10b</b>              | 2-thiazole      | 3.46                      |
| <b>10c</b>              | 2-benzoxazole   | 4.34                      |
| <b>10d</b>              | 2-benzothiazole | 6.87                      |
| <b>11a</b>              | 3-nitrobenzene  | 5.41                      |
| <b>11b</b>              | 4-ethylbenzene  | 6.73                      |
| <b>11c</b>              | 4-chlorobenzene | 7.48                      |
| kojic acid ( <b>5</b> ) |                 | 4.43                      |

**Table S2.** 3-Hydroxy-1*H*-pyrrol-2(5*H*)-one derivatives, see **Figure 4** (3-Hydroxy-1*H*-pyrrol-2(5*H*)-one derivatives and their inhibitory activity).

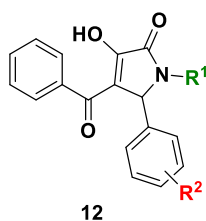

| Compound                | R <sup>1</sup> | R <sup>2</sup>    | IC <sub>50</sub> (μM ± SE) |
|-------------------------|----------------|-------------------|----------------------------|
| <b>12a</b>              | phenyl         | H                 | 6.98                       |
| <b>12b</b>              | phenyl         | 2-F               | 8.12                       |
| <b>12c</b>              | phenyl         | 2-Cl              | -                          |
| <b>12d</b>              | phenyl         | 3-Br              | -                          |
| <b>12e</b>              | phenyl         | 4-NO <sub>2</sub> | -                          |
| <b>12f</b>              | phenyl         | 4-OMe             | -                          |
| <b>12g</b>              | 2-propenyl     | 2-F               | 9.77                       |
| <b>12h</b>              | 2-propenyl     | 2-Cl              | -                          |
| <b>12i</b>              | 2-propenyl     | 4-Cl              | -                          |
| <b>12j</b>              | 2-propenyl     | 2-Br              | -                          |
| <b>12k</b>              | 2-propenyl     | 3-Br              | -                          |
| <b>12l</b>              | 2-propenyl     | 4-NO <sub>2</sub> | 26.73                      |
| <b>12m</b>              | 2-propenyl     | 4-OMe             | -                          |
| <b>12n</b>              | 2-F-phenyl     | H                 | -                          |
| <b>12o</b>              | 4-Cl-Phenyl    | H                 | -                          |
| <b>12p</b>              | 4-Cl-Phenyl    | 4-OMe             | -                          |
| <b>12q</b>              | 4-Br-Phenyl    | H                 | -                          |
| <b>12r</b>              | 4-ethyl-phenyl | H                 | -                          |
| <b>12s</b>              | 4-ethyl-phenyl | 2-F               | -                          |
| kojic acid ( <b>5</b> ) |                |                   | 18.56                      |

**Table S3.** 2-Cyanopyrrole derivatives, see **Figure 5** (Derivatives of 2-cyanopyrrole and their inhibitory activities).

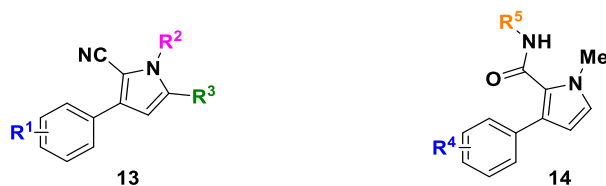

| Compound                | R <sup>1</sup>    | R <sup>2</sup> | R <sup>3</sup> | R <sup>4</sup>    | R <sup>5</sup>               | IC <sub>50</sub> (μM) |
|-------------------------|-------------------|----------------|----------------|-------------------|------------------------------|-----------------------|
| <b>13a</b>              | 2-vinyl           | Me             | H              | -                 | -                            | 0.97                  |
| <b>13b</b>              | 2-OMe; 5-Br       | Me             | H              | -                 | -                            | 2.11                  |
| <b>13c</b>              | 2,3-diCl          | Me             | H              | -                 | -                            | 4.83                  |
| <b>13d</b>              | H                 | Me             | H              | -                 | -                            | 7.42                  |
| <b>13e</b>              | 4-Br              | Me             | H              | -                 | -                            | 8.17                  |
| <b>13f</b>              | 2-Br              | Me             | H              | -                 | -                            | 8.47                  |
| <b>13g</b>              | 2-F               | Me             | H              | -                 | -                            | 8.72                  |
| <b>13h</b>              | 4-CF <sub>3</sub> | Me             | H              | -                 | -                            | 12.44                 |
| <b>13i</b>              | 3-Br              | Me             | H              | -                 | -                            | 16.52                 |
| <b>13j</b>              | 3-F               | Me             | H              | -                 | -                            | 21.43                 |
| <b>13k</b>              | 2-OMe             | Me             | H              | -                 | -                            | 23.57                 |
| <b>13l</b>              | 4-OMe             | Me             | H              | -                 | -                            | 89.15                 |
| <b>13m</b>              | H                 | Et             | Me             | -                 | -                            | 4.46                  |
| <b>13n</b>              | 4-Cl              |                |                | -                 | -                            | 5.06                  |
| <b>13o</b>              | 4-Cl              |                |                | -                 | -                            | 5.57                  |
| <b>13p</b>              | 4-Cl              | benzyl         | H              | -                 | -                            | 80.46                 |
| <b>13q</b>              | 4-Cl              | Me             | phenyl         | -                 | -                            | 87.32                 |
| <b>14a</b>              | -                 | -              | -              | 3-Br              | H                            | >200                  |
| <b>14b</b>              | -                 | -              | -              | 3-Br              | CO <sub>2</sub> <i>t</i> -Bu | >200                  |
| <b>14c</b>              | -                 | -              | -              | 4-Br              | H                            | >200                  |
| <b>14d</b>              | -                 | -              | -              | 4-Br              | CO <sub>2</sub> <i>t</i> -Bu | >200                  |
| <b>14e</b>              | -                 | -              | -              | 3-F               | CO <sub>2</sub> <i>t</i> -Bu | >200                  |
| <b>14f</b>              | -                 | -              | -              | H                 | CO <sub>2</sub> <i>t</i> -Bu | >200                  |
| <b>14g</b>              | -                 | -              | -              | 4-CF <sub>3</sub> | CO <sub>2</sub> <i>t</i> -Bu | >200                  |
| <b>14h</b>              | -                 | -              | -              | 2-F               | CO <sub>2</sub> <i>t</i> -Bu | >200                  |
| kojic acid ( <b>5</b> ) |                   |                |                |                   |                              | 28.72                 |

**Table S4.** Indole-carbohydrazide derivatives, see **Figure 6** (Indole-carbohydrazide derivatives).

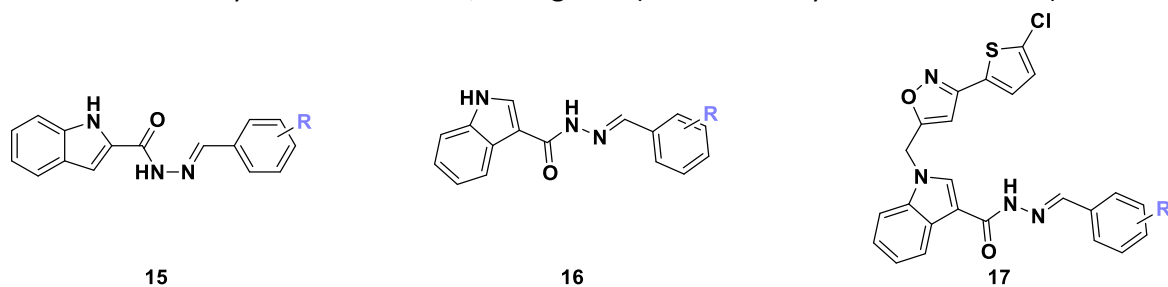

| Compound   | R        | IC <sub>50</sub> (μM) |
|------------|----------|-----------------------|
| <b>15a</b> | 4-OH     | 0.070                 |
| <b>15b</b> | 2,4-diCl | 61.52                 |

|                         |           |       |
|-------------------------|-----------|-------|
| <b>15c</b>              | 3-F       | 69.66 |
| <b>15d</b>              | 4-OMe     | 72.94 |
| <b>15e</b>              | 3-Cl      | 78.52 |
| <b>15f</b>              | H         | 79.43 |
| <b>15g</b>              | 2,3-diOH  | 80.72 |
| <b>15h</b>              | 2,4-diOH  | -     |
| <b>16a</b>              | 4-OH      | 0.072 |
| <b>16b</b>              | 2,4-diCl  | 94.84 |
| <b>16c</b>              | 3-F       | -     |
| <b>16d</b>              | 3-Cl      | -     |
| <b>16e</b>              | 4-OMe     | -     |
| <b>16f</b>              | H         | -     |
| <b>16g</b>              | 2,4-diOH  | -     |
| <b>16h</b>              | 2,3-diOH  | -     |
| <b>17a</b>              | 4-OH      | 0.19  |
| <b>17b</b>              | 4-OMe     | 2.96  |
| <b>17c</b>              | 2,4-diOH  | 3.30  |
| <b>17d</b>              | 2,3-diOH  | 3.40  |
| <b>17e</b>              | 2,5-diOH  | 4.62  |
| <b>17f</b>              | 3-Cl      | 47.42 |
| <b>17g</b>              | H         | 95.06 |
| <b>17h</b>              | 3-F       | -     |
| <b>17i</b>              | 2,3-diOMe | -     |
| kojic acid ( <b>5</b> ) |           | 9.28  |

**Table S5.** *N*-Phenylacetamide-oxindole-thiosemicarbazide hybrids, see **Figure 7** (*N*-Phenylacetamide-oxindole-thiosemicarbazide hybrids (**18**) and their activities).

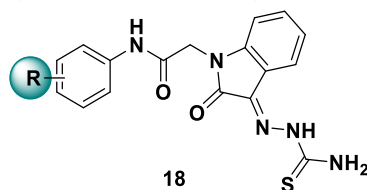

| Compound                | R                       | IC <sub>50</sub> (μM) |
|-------------------------|-------------------------|-----------------------|
| <b>18a</b>              | 2-Me; 4-NO <sub>2</sub> | 0.80                  |
| <b>18b</b>              | 2-F                     | 0.84                  |
| <b>18c</b>              | 4-Br                    | 0.89                  |
| <b>18d</b>              | 4-F                     | 0.97                  |
| <b>18e</b>              | 4-Me                    | 1.06                  |
| <b>18f</b>              | 4-Cl                    | 1.21                  |
| <b>18g</b>              | 3-F                     | 1.44                  |
| <b>18h</b>              | 2-Me                    | 1.73                  |
| <b>18i</b>              | 4-NO <sub>2</sub>       | 2.14                  |
| <b>18l</b>              | 2-Cl                    | 2.17                  |
| <b>18m</b>              | H                       | 2.30                  |
| <b>18n</b>              | 2,3-diCl                | 2.47                  |
| <b>18o</b>              | 3-Cl                    | 2.85                  |
| <b>18p</b>              | 4-OMe                   | 3.40                  |
| <b>18q</b>              | 2,6-diCl                | 3.88                  |
| kojic acid ( <b>5</b> ) |                         | 36.32                 |

**Table S6.** Aryl pyrazole derivatives, see **Figure 8** (TYRIs bearing an aryl pyrazole moiety).

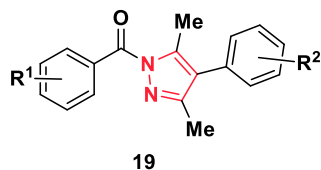

| Compound                | R <sup>1</sup>    | R <sup>2</sup>    | IC <sub>50</sub> (μM) |
|-------------------------|-------------------|-------------------|-----------------------|
| <b>19a</b>              | 2,4-diOMe         | 4-NH <sub>2</sub> | 1.56                  |
| <b>19b</b>              | 3-Me              | 4-NO <sub>2</sub> | 2.12                  |
| <b>19c</b>              | 4-NO <sub>2</sub> | 4-OMe             | 2.31                  |
| <b>19d</b>              | 2,4-diOMe         | 4-NO <sub>2</sub> | 3.37                  |
| <b>19e</b>              | 4-OMe             | 4-NH <sub>2</sub> | 6.46                  |
| <b>19f</b>              | 4-Me              | 4-NH <sub>2</sub> | 7.75                  |
| <b>19g</b>              | 4-NO <sub>2</sub> | 3-NH <sub>2</sub> | 7.89                  |
| <b>19h</b>              | 3-Me              | 4-OMe             | 10.07                 |
| <b>19i</b>              | 4-OMe             | 4-NO <sub>2</sub> | 15.13                 |
| <b>19j</b>              | 4-Me              | 4-OMe             | 16.59                 |
| <b>19k</b>              | 3-Me              | 4-NH <sub>2</sub> | 19.53                 |
| <b>19l</b>              | 4-NO <sub>2</sub> | 4-NH <sub>2</sub> | 19.65                 |
| kojic acid ( <b>5</b> ) |                   |                   | 16.05                 |

**Table S7.** 1,2,3-Triazolo-coumarino[4,3-c]pyrazole derivatives, see **Figure 9** (Inhibitory effects of 1,2,3-triazolo-coumarino[4,3-c]pyrazole derivatives).

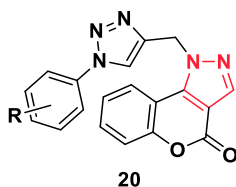

| Compound                | R           | PI (%) |
|-------------------------|-------------|--------|
| <b>20a</b>              | H           | 85.0   |
| <b>20b</b>              | 2,4,6-triCl | 72.0   |
| <b>20c</b>              | 3-Me        | 66.0   |
| <b>20d</b>              | 4-Cl        | 46.0   |
| <b>20e</b>              | phenyl      | -      |
| kojic acid ( <b>5</b> ) |             | 85.2   |

**Table S8.** Pyrazole-resorcinol derivatives, see **Figure 10** (Pyrazole-resorcinol derivatives with promising biological profiles).

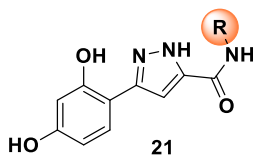

| Compound   | R                   | IC <sub>50</sub> monophenolase (μM) | IC <sub>50</sub> diphenolase (μM) |
|------------|---------------------|-------------------------------------|-----------------------------------|
| <b>21a</b> | 3,4,5-triOMe-phenyl | 0.006                               | 0.64                              |

|                         |                             |       |       |
|-------------------------|-----------------------------|-------|-------|
| <b>22b</b>              | 4-CO <sub>2</sub> Me-phenyl | 0.02  | 0.45  |
| <b>22c</b>              | 4-OMe-phenyl                | 0.03  | -     |
| <b>22d</b>              | 4-F-phenyl                  | 0.03  | 0.97  |
| <b>22e</b>              | naphthalen-2-yl             | 0.04  | 2.88  |
| <b>22f</b>              | 2-Me-phenyl                 | 0.06  | 3.55  |
| <b>22g</b>              | 4-Cl-phenyl                 | 0.06  | 1.69  |
| <b>22h</b>              | naphthalen-1-yl             | 0.07  | 6.19  |
| <b>22i</b>              | 2-OMe-phenyl                | 0.07  | 11.25 |
| <b>22j</b>              | 2,6-diOMe-phenyl            | 0.08  | 10.70 |
| <b>22k</b>              | 4-Br-phenyl                 | 0.11  | 4.21  |
| <b>22l</b>              | 4-Me-phenyl                 | 0.11  | 2.23  |
| <b>22m</b>              | 4-CN-phenyl                 | 0.12  | 6.51  |
| <b>22n</b>              | 4- <i>i</i> Pr-phenyl       | 0.14  | 0.14  |
| <b>22o</b>              | 3-OMe-phenyl                | 0.26  | 10.14 |
| <b>22p</b>              | 3-Me-phenyl                 | 0.33  | 0.45  |
| <b>22q</b>              | phenyl                      | 0.33  | 5.23  |
| <b>22r</b>              | 6-methylpyridin-2-yl        | 0.73  | 6.86  |
| <b>22s</b>              | 3-F-phenyl                  | 0.79  | 7.23  |
| kojic acid ( <b>5</b> ) |                             | 21.58 | 17.76 |

**Table S9.** Benzimidazole-1,2,3-triazole derivatives, see **Figure 12** (Benzimidazole-1,2,3-triazole hybrids).

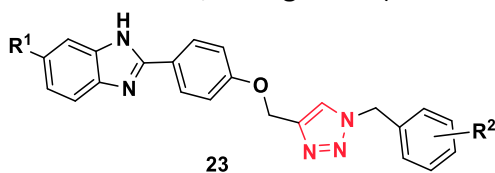

| Compound               | R <sup>1</sup> | R <sup>2</sup>    | IC <sub>50</sub> (μM) |
|------------------------|----------------|-------------------|-----------------------|
| <b>23a</b>             | H              | 3,4-diCl          | 9.42                  |
| <b>23b</b>             | H              | 4-Br              | 10.34                 |
| <b>23c</b>             | H              | 2-F               | 45.22                 |
| <b>23d</b>             | H              | 4-F               | 46.89                 |
| <b>23e</b>             | H              | 4-NO <sub>2</sub> | 48.00                 |
| <b>23f</b>             | H              | Phenyl            | >50                   |
| <b>23g</b>             | H              | 4-Me              | >50                   |
| <b>23h</b>             | H              | 2-Cl              | >50                   |
| <b>23i</b>             | H              | 2,3-diCl          | >50                   |
| <b>23j</b>             | Me             | 4-F               | 29.31                 |
| <b>23k</b>             | Me             | H                 | 43.30                 |
| <b>23l</b>             | Me             | 2-Cl              | >50                   |
| <b>23m</b>             | Me             | 3-Cl              | >50                   |
| <b>23n</b>             | Me             | 2,3-diCl          | >50                   |
| <b>23o</b>             | Me             | 3,4-diCl          | >50                   |
| <b>23p</b>             | Me             | 4-Br              | >50                   |
| <b>23q</b>             | Me             | 4-NO <sub>2</sub> | >50                   |
| <b>23r</b>             | Me             | 4-Me              | >50                   |
| koji acid ( <b>5</b> ) |                |                   | 9.28                  |

**Table S10.** 1,2,4-Triazol-3-ylthio-*N*-phenyl acetamide derivatives, see **Figure 13a** (1,2,4-Triazol-3-ylthio-*N*-phenyl acetamide derivatives (**24**) containing the 2-aminothiazole moiety (a) in the position five of the triazole ring).

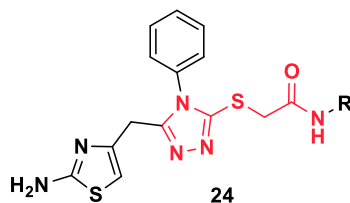

| Compound                | R                | IC <sub>50</sub> (μM) |
|-------------------------|------------------|-----------------------|
| <b>24a</b>              | 2-Me-phenyl      | 0.0156                |
| <b>24b</b>              | ethyl phenyl     | 0.0161                |
| <b>24c</b>              | 2,6-diMe-phenyl  | 0.0513                |
| <b>24d</b>              | 2,4-diMe-phenyl  | 0.0547                |
| <b>24e</b>              | 2,5-diMe-phenyl  | 0.0589                |
| <b>24f</b>              | 2-Et-phenyl      | 0.0652                |
| <b>24g</b>              | 3,4-diMe-phenyl  | 0.1133                |
| <b>24h</b>              | 4-Et-phenyl      | 0.1224                |
| <b>24i</b>              | phenyl           | 0.1330                |
| <b>24j</b>              | 4-OEt-phenyl     | 0.1726                |
| <b>24k</b>              | 2-Et,6-Me-phenyl | 0.1943                |
| <b>24l</b>              | 3,5-diMe-phenyl  | 0.2465                |
| <b>24m</b>              | benzyl           | 1.0108                |
| <b>24n</b>              | 2,3-diMe-phenyl  | 2.0181                |
| kojic acid ( <b>5</b> ) |                  | 16.8320               |

**Table S11.** 1,2,4-Triazol-3-ylthio-*N*-phenyl acetamide derivatives, see **Figure 13b** (1,2,4-Triazol-3-ylthio-*N*-phenyl acetamide derivatives containing a phenyl ring (**25**) (b) in the position five of the triazole ring).

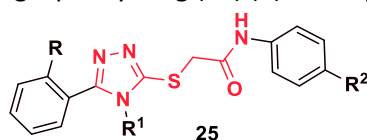

| Compound                | R | R <sup>1</sup> | R <sup>2</sup> | IC <sub>50</sub> (μM) |
|-------------------------|---|----------------|----------------|-----------------------|
| <b>25a</b>              | H | 2-OMe-phenyl   | Br             | 0.0048                |
| <b>25b</b>              | H | 2-OMe-phenyl   | H              | 0.0238                |
| <b>25c</b>              | H | 2-OMe-phenyl   | F              | 0.0802                |
| <b>25d</b>              | H | 2-OMe-phenyl   | I              | 0.6545                |
| <b>25e</b>              | F | 2-OMe-phenyl   | I              | 0.0605                |
| <b>25f</b>              | F | 2-OMe-phenyl   | Br             | 0.1537                |
| <b>25d</b>              | F | 2-OMe-phenyl   | F              | 0.1691                |
| <b>25h</b>              | F | 2-OMe-phenyl   | H              | 0.5425                |
| <b>25i</b>              | H | <i>n</i> -Bu   | H              | 0.2144                |
| <b>25j</b>              | H | <i>n</i> -Bu   | I              | 0.2179                |
| <b>25k</b>              | H | <i>n</i> -Bu   | Br             | 0.3431                |
| <b>25l</b>              | H | <i>n</i> -Bu   | F              | 0.3696                |
| kojic acid ( <b>5</b> ) |   |                |                | 16.8320               |

**Table S12.** Triazoles derivatives, see **Figure 14** (Aryl phenoxy methyl triazoles conjugated with thiosemicarbazides derivatives).

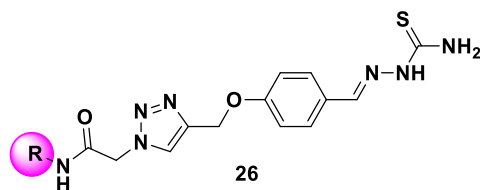

| Compound                | R                              | IC <sub>50</sub> monophenolase (μM) | IC <sub>50</sub> diphenolase (μM) |
|-------------------------|--------------------------------|-------------------------------------|-----------------------------------|
| <b>26a</b>              | benzyl                         | 0.11                                | 0.17                              |
| <b>26b</b>              | 4-OMe-phenyl                   | 0.12                                | 0.52                              |
| <b>26c</b>              | 4-F-phenyl                     | 0.14                                | 0.60                              |
| <b>26d</b>              | 3-OMe-phenyl                   | 0.22                                | 0.84                              |
| <b>26e</b>              | 2-Me,3-NO <sub>2</sub> -phenyl | 0.25                                | 0.56                              |
| <b>26f</b>              | 4-Br-phenyl                    | 0.35                                | 0.21                              |
| <b>26g</b>              | 2,3-diCl-phenyl                | 0.42                                | 0.42                              |
| <b>26h</b>              | 4-NO <sub>2</sub> -phenyl      | 0.42                                | 0.68                              |
| <b>26i</b>              | 2-Me,3-Cl-phenyl               | 0.46                                | 0.26                              |
| <b>26j</b>              | 4-Cl-phenyl                    | 0.50                                | 0.14                              |
| <b>26k</b>              | 3-Br-phenyl                    | 0.51                                | 0.31                              |
| <b>26l</b>              | 3-Cl-phenyl                    | 0.51                                | 0.50                              |
| <b>26m</b>              | phenyl                         | 0.79                                | 2.18                              |
| <b>26n</b>              | 4-F-benzyl                     | 0.83                                | 0.43                              |
| kojic acid ( <b>5</b> ) |                                | 9.28                                | 9.30                              |

**Table S13.** 1,2,4-Triazole-thiosemicarbazide derivatives, see **Figure 15** (1,2,4-Triazole-thiosemicarbazide hybrid molecules).

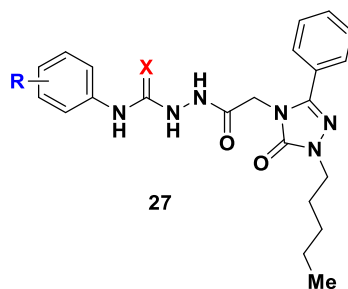

| Compound   | R                     | X | IC <sub>50</sub> (μM) |
|------------|-----------------------|---|-----------------------|
| <b>27a</b> | 2,4-diCl              | O | 0.00162               |
| <b>27b</b> | 2-CF <sub>3</sub>     | O | 0.00166               |
| <b>27c</b> | 3-CF <sub>3</sub>     | O | 0.00165               |
| <b>27d</b> | 3,5-diCF <sub>3</sub> | O | 0.00197               |
| <b>27e</b> | 2-F                   | O | >20                   |
| <b>27f</b> | 3-F                   | O | >20                   |
| <b>27g</b> | 4-F                   | O | >20                   |
| <b>27h</b> | 2,4-diF               | O | >20                   |
| <b>27i</b> | 2-Cl                  | O | >20                   |
| <b>27j</b> | 3-Cl                  | O | >20                   |
| <b>27k</b> | 4-Cl                  | O | >20                   |
| <b>27l</b> | 3,5-diCl              | O | >20                   |
| <b>27m</b> | 2-Br                  | O | >20                   |
| <b>27n</b> | 3-Br                  | O | >20                   |

|                         |                       |   |        |
|-------------------------|-----------------------|---|--------|
| <b>27o</b>              | 4-Br                  | O | >20    |
| <b>27p</b>              | 4-CF <sub>3</sub>     | O | >20    |
| <b>27q</b>              | 4-F                   | S | 0.0145 |
| <b>27r</b>              | 2,4-diF               | S | 0.019  |
| <b>27s</b>              | 4-Br                  | S | 0.0199 |
| <b>27t</b>              | 3,5-diCl              | S | 0.17   |
| <b>27u</b>              | 4-Cl                  | S | 0.1885 |
| <b>27v</b>              | 4-CF <sub>3</sub>     | S | 1.49   |
| <b>27w</b>              | 2-Cl                  | S | 4.68   |
| <b>27x</b>              | 3-Cl                  | S | 5.4    |
| <b>27y</b>              | 2-CF <sub>3</sub>     | S | 5.62   |
| <b>27z</b>              | 3-F                   | S | 15.2   |
| <b>27aa</b>             | 2,4-diCl              | S | >20    |
| <b>27bb</b>             | 2-F                   | S | >20    |
| <b>27cc</b>             | 2-Br                  | S | >20    |
| <b>27dd</b>             | 3-Br                  | S | >20    |
| <b>27ee</b>             | 3-CF <sub>3</sub>     | S | >20    |
| <b>27ff</b>             | 3,5-diCF <sub>3</sub> | S | >20    |
| kojic acid ( <b>5</b> ) |                       |   | 14.09  |

**Table S14.** 1,2,4-Triazole based compounds, see **Figure 16** (1,2,4-Triazole based compounds (**28**) and their inhibitory activities).

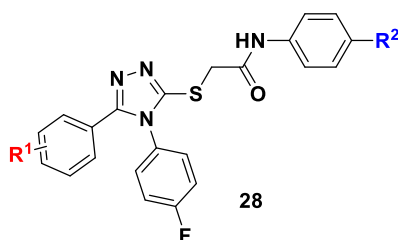

| Compound                | R <sup>1</sup> | R <sup>2</sup> | IC <sub>50</sub> (μM) |
|-------------------------|----------------|----------------|-----------------------|
| <b>28a</b>              | 2-F            | 4-F            | 0.098                 |
| <b>28b</b>              | 2-F            | H              | 0.111                 |
| <b>28c</b>              | 4-F            | H              | 0.124                 |
| <b>28d</b>              | H              | 4-Br           | 0.142                 |
| <b>28e</b>              | H              | H              | 0.219                 |
| <b>28f</b>              | H              | 4-F            | 0.379                 |
| <b>28g</b>              | 4-F            | 4-F            | -                     |
| <b>28h</b>              | 4-F            | 4-Br           | -                     |
| <b>28i</b>              | 2-F            | 4-Br           | -                     |
| kojic acid ( <b>5</b> ) |                |                | 16.832                |

**Table S15.** Thiazole-triazole based compounds, see **Figure 17** (Thiazole-triazole hybrids as TYRIs).

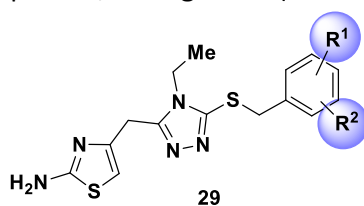

| Compound | R <sup>1</sup> | R <sup>2</sup> | IC <sub>50</sub> (μM) |
|----------|----------------|----------------|-----------------------|
|----------|----------------|----------------|-----------------------|



|                         |      |      |         |
|-------------------------|------|------|---------|
| <b>29a</b>              | 2-Cl | 4-Cl | 0.0018  |
| <b>29b</b>              | H    | 3-Br | 0.0021  |
| <b>29c</b>              | 2-Cl | H    | 0.0059  |
| <b>29d</b>              | H    | 4-Cl | 0.0066  |
| <b>29e</b>              | H    | 4-F  | 0.0115  |
| <b>29f</b>              | 3-Cl | 4-Cl | 0.0142  |
| <b>29g</b>              | 2-Br | H    | 0.0157  |
| <b>29h</b>              | H    | 4-Br | 0.0243  |
| <b>29i</b>              | H    | 3-Me | 0.0341  |
| <b>29j</b>              | 2-Me | H    | 0.0713  |
| <b>29k</b>              | H    | 4-Me | 0.0782  |
| <b>29l</b>              | H    | H    | 0.0896  |
| kojic acid ( <b>5</b> ) |      |      | 16.8320 |

**Table S16.** Tetrazole based compounds, see **Figure 18** (Tetrazole-containing TYRIs **30**).

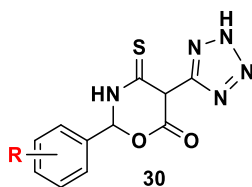

| Compound                | R                     | IC <sub>50</sub> (μM) |
|-------------------------|-----------------------|-----------------------|
| <b>30a</b>              | 2-Br                  | 0.0371                |
| <b>30b</b>              | 2,4-diCl              | 0.0472                |
| <b>30c</b>              | 3-NO <sub>2</sub>     | 0.0601                |
| <b>30d</b>              | 3-Cl                  | 0.0715                |
| <b>30e</b>              | 4-OMe                 | 0.0728                |
| <b>30f</b>              | 3,5-diNO <sub>2</sub> | 0.0758                |
| <b>30g</b>              | 4-NO <sub>2</sub>     | 0.0815                |
| <b>30h</b>              | 2-Cl                  | 0.0883                |
| <b>30i</b>              | 2,6-diOMe             | 0.1992                |
| <b>30j</b>              | 4-Cl                  | 0.2941                |
| <b>30k</b>              | 4-Me                  | 0.3080                |
| kojic acid ( <b>5</b> ) |                       | 16.832                |

**Table S17.** Chalcone derivatives, see **Figure 20** (TYRIs combining chalcone and furan moieties).

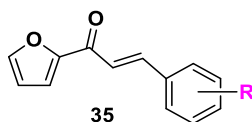

| Compound   | R              | IC <sub>50</sub> (μM) |
|------------|----------------|-----------------------|
| <b>35a</b> | 2,4-diOH       | 0.28                  |
| <b>35b</b> | 3,4-diOH       | 24.86                 |
| <b>35c</b> | 3,5-diBr,4-OH  | 27.17                 |
| <b>35d</b> | 3-OH,4-OMe     | 37.36                 |
| <b>35e</b> | 3-OMe,4-OH     | >200                  |
| <b>35f</b> | 3,5-diOMe,4-OH | >200                  |
| <b>35g</b> | 3-Br,4-OH      | >200                  |
| <b>35h</b> | 4-OH           | >200                  |

|                         |  |       |
|-------------------------|--|-------|
| kojic acid ( <b>5</b> ) |  | 33.47 |
|-------------------------|--|-------|

**Table S18.** Isobenzofuran-1(3*H*)-one derivatives, see **Figure 21** (Derivatives of isobenzofuran-1(3*H*)-one (**36a**) and their inhibitory profile).

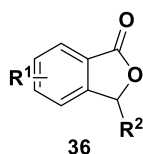

| Compound                | R <sup>1</sup> | R <sup>2</sup>                                 | IC <sub>50</sub> (μM) |
|-------------------------|----------------|------------------------------------------------|-----------------------|
| <b>36a</b>              | H              | OH                                             | 156.03                |
| <b>36b</b>              | H              | 2,6-diCO <sub>2</sub> Me-phenyl                | 194.01                |
| <b>36c</b>              | H              | 2,6-diOH,4- <i>i</i> Pr-phenyl                 | 255.23                |
| <b>36d</b>              | 5-OMe          | H                                              | -                     |
| <b>36e</b>              | 5-OH           | H                                              | -                     |
| <b>36f</b>              | H              | 2,6-diOH,4-Me-phenyl                           | -                     |
| <b>36g</b>              | H              | 2,6-diOH-phenyl                                | -                     |
| <b>36h</b>              | H              | 2,6-diCO <sub>2</sub> Me,4-Me-phenyl           | -                     |
| <b>36i</b>              | H              | 2,6-diCO <sub>2</sub> Me,4- <i>i</i> Pr-phenyl | -                     |
| <b>36j</b>              | 6-OMe          | H                                              | -                     |
| <b>36k</b>              | 6-OH           | H                                              | -                     |
| kojic acid ( <b>5</b> ) |                |                                                | 5.71                  |

**Table S19.** Aurone derivatives, see **Figure 22** (Chemical structures of aurone derivatives **37** and their activities as AbTYRIS).

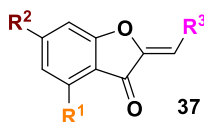

| Compound   | R <sup>1</sup>  | R <sup>2</sup> | R <sup>3</sup>            | IC <sub>50</sub> (μM) |
|------------|-----------------|----------------|---------------------------|-----------------------|
| <b>37a</b> | H               | H              | 4-Me-phenyl               | 7.12                  |
| <b>37b</b> | H               | H              | 3-OMe,4-OPr-phenyl        | 9.94                  |
| <b>37c</b> | H               | H              | 5-OMe-2-naphtyl           | 10.12                 |
| <b>37d</b> | H               | H              | 3-OMe,4-OBu-phenyl        | 10.56                 |
| <b>37e</b> | H               | H              | 4-OMe-phenyl              | 10.65                 |
| <b>37f</b> | H               | H              | 4-OEt-phenyl              | 12.52                 |
| <b>37g</b> | H               | H              | 3-OMe,4-OMe-phenyl        | 13.35                 |
| <b>37h</b> | H               | H              | 4-COOH-phenyl             | 14.23                 |
| <b>37i</b> | H               | H              | 4-CHO-phenyl              | 15.24                 |
| <b>37k</b> | H               | H              | 3-OMe,4-OBn-phenyl        | 20.82                 |
| <b>37l</b> | H               | H              | 4-Cl-phenyl               | 34.31                 |
| <b>37m</b> | H               | H              | 2-CF <sub>3</sub> -phenyl | 44.21                 |
| <b>37n</b> | H               | H              | 2-thiophenyl              | 54.51                 |
| <b>37o</b> | H               | H              | 4-F-phenyl                | 66.82                 |
| <b>37p</b> | Br              | Br             | 4-Cl-phenyl               | 16.54                 |
| <b>37q</b> | Br              | Br             | 4-CF <sub>3</sub> -phenyl | 19.76                 |
| <b>37r</b> | Br              | Br             | 2-furanyl                 | 39.45                 |
| <b>37s</b> | NO <sub>2</sub> | Cl             | 3-OMe,4-OBn-phenyl        | 8.25                  |
| <b>37t</b> | NO <sub>2</sub> | Cl             | 3-OMe,4-OPr-phenyl        | 9.55                  |

|                         |                 |    |                                            |       |
|-------------------------|-----------------|----|--------------------------------------------|-------|
| <b>37u</b>              | NO <sub>2</sub> | Cl | 2,4-diMe-phenyl                            | 10.34 |
| <b>37v</b>              | NO <sub>2</sub> | Cl | 4-OMe-phenyl                               | 13.10 |
| <b>37w</b>              | NO <sub>2</sub> | Cl | 4-Cl-phenyl                                | 15.23 |
| <b>37x</b>              | NO <sub>2</sub> | Cl | 4-F-phenyl                                 | 16.33 |
| <b>37y</b>              | NO <sub>2</sub> | Cl | 4-N(CH <sub>3</sub> ) <sub>2</sub> -phenyl | 25.31 |
| <b>37z</b>              | NO <sub>2</sub> | Cl | 2-thiophenyl                               | 26.90 |
| kojic acid ( <b>5</b> ) |                 |    |                                            | 16.69 |

**Table S20.** Thiophene derivatives, see **Figure 23** (Thiophene derivatives).

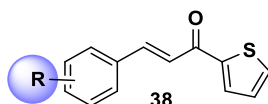

| Compound                | R              | IC <sub>50</sub> (μM) |
|-------------------------|----------------|-----------------------|
| <b>38a</b>              | 2,4-diOH       | 0.93                  |
| <b>38b</b>              | 3-OH,4-OMe     | 28.72                 |
| <b>38c</b>              | 4-OH           | 60.05                 |
| <b>38d</b>              | 3,4-diOH       | 103.44                |
| <b>38e</b>              | 3-Br,4-OH      | 112.09                |
| <b>38f</b>              | 3-OMe,4-OH     | >200                  |
| <b>38g</b>              | 2,5-diBr,4-OH  | >200                  |
| <b>38h</b>              | 3,5-diOMe,4-OH | >200                  |
| kojic acid ( <b>5</b> ) |                | 0.93                  |

**Table S21.** Isoxazole derivatives, see **Figure 24** ((*Z*)-4-(Substituted benzylidene)-3-phenylisoxazol-5(4*H*)-one derivatives).

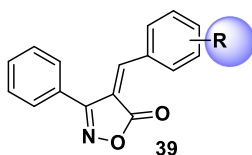

| Compound                | R             | PI (%) | IC <sub>50</sub> (μM) |
|-------------------------|---------------|--------|-----------------------|
| <b>39a</b>              | 3-Br,4-OH     | 70.22  | 14.62                 |
| <b>39b</b>              | 2,4-diOH      | 72.73  | -                     |
| <b>39c</b>              | 3,5-diOH,4-OH | 47.29  | -                     |
| <b>39d</b>              | 3-OEt,4-OH    | 44.52  | -                     |
| <b>39e</b>              | 3-OH,4-OMe    | 42.03  | -                     |
| <b>39f</b>              | 3,4-diOMe     | 40.02  | -                     |
| <b>39g</b>              | 4-OMe         | 28.45  | -                     |
| <b>39h</b>              | 4-OH          | 24.60  | -                     |
| <b>39i</b>              | 3-OMe,4-OH    | -      | -                     |
| <b>39j</b>              | 3,4-diOH      | -      | -                     |
| <b>39k</b>              | 3,4,5-triOMe  | -      | -                     |
| <b>39l</b>              | 2,4-diOH      | -      | -                     |
| <b>39m</b>              | 2-OH          | -      | -                     |
| kojic acid ( <b>5</b> ) |               | -      | 58.44                 |

**Table S22.** 2-Thioxooxazoline-4-one derivatives, see **Figure 25** (2-Thioxooxazoline-4-one derivatives **44** as tyrosinase inhibitors).

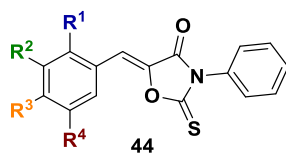

| Compound                | R <sup>1</sup> | R <sup>2</sup> | R <sup>3</sup> | R <sup>4</sup> | PI (%) | IC <sub>50</sub> (μM) |
|-------------------------|----------------|----------------|----------------|----------------|--------|-----------------------|
| <b>44a</b>              | OH             | H              | OH             | H              | 78.05  | 4.70                  |
| <b>44b</b>              | OH             | H              | H              | H              | 71.12  | 11.18                 |
| <b>44c</b>              | H              | OH             | OH             | H              | 30.57  | -                     |
| <b>44d</b>              | H              | Br             | OH             | H              | 24.96  | -                     |
| <b>44e</b>              | H              | OH             | OMe            | H              | 13.39  | -                     |
| <b>44f</b>              | H              | H              | OH             | H              | 10.25  | -                     |
| <b>44g</b>              | H              | OMe            | OH             | OMe            | 10.22  | -                     |
| <b>44h</b>              | H              | <i>t</i> -Bu   | OH             | <i>t</i> -Bu   | 8.53   | -                     |
| <b>44i</b>              | H              | OMe            | OMe            | H              | 7.47   | -                     |
| <b>44j</b>              | OMe            | H              | OMe            | H              | 4.09   | -                     |
| <b>44j</b>              | H              | Br             | OH             | Br             | -      | -                     |
| <b>44l</b>              | F              | H              | F              | H              | -      | -                     |
| <b>44m</b>              | H              | OMe            | OH             | H              | -      | -                     |
| <b>44n</b>              | H              | OEt            | OH             | H              | -      | -                     |
| <b>44o</b>              | H              | H              | OMe            | H              | -      | -                     |
| <b>44p</b>              | H              | OMe            | OMe            | OMe            | -      | -                     |
| kojic acid ( <b>5</b> ) |                |                |                |                | 58.09  | 23.18                 |

**Table S23.** 1,3,4-Oxadiazoles derivatives, see **Figure 26** (The tyrosinase inhibition potential of 1,3,4-oxadiazoles derivatives **45**).

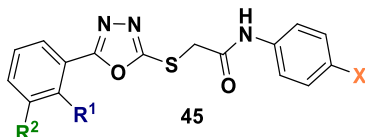

| Compound                | R <sup>1</sup> | R <sup>2</sup> | X  | IC <sub>50</sub> (μM) |
|-------------------------|----------------|----------------|----|-----------------------|
| <b>45a</b>              | OMe            | H              | H  | 0.003                 |
| <b>45b</b>              | OMe            | H              | F  | 0.018                 |
| <b>45c</b>              | H              | OMe            | H  | 0.019                 |
| <b>45d</b>              | OMe            | H              | I  | 0.023                 |
| <b>45e</b>              | H              | OMe            | F  | 0.027                 |
| <b>45f</b>              | H              | H              | Br | 0.039                 |
| <b>45g</b>              | OMe            | H              | Br | 0.046                 |
| <b>45h</b>              | H              | H              | I  | 0.085                 |
| <b>45i</b>              | H              | OMe            | I  | 0.088                 |
| <b>45j</b>              | H              | OMe            | Br | 0.145                 |
| <b>45k</b>              | H              | H              | H  | 0.231                 |
| <b>45l</b>              | H              | H              | F  | 0.396                 |
| kojic acid ( <b>5</b> ) |                |                |    | 16.832                |

**Table S24.** 2-Aminothiazole-oxadiazole derivatives, see **Figure 27** (2-Aminothiazole-oxadiazole bi-heterocyclic hybrids **46** and their potential as AbTYR inhibitors).

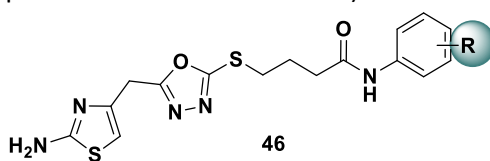

| Compound                | R        | IC <sub>50</sub> (μM) |
|-------------------------|----------|-----------------------|
| <b>46a</b>              | 2-Me     | 0.0311                |
| <b>46b</b>              | 2-Et     | 0.0349                |
| <b>46c</b>              | 2,5-diMe | 0.1987                |
| <b>46d</b>              | 3,5-diMe | 0.4611                |
| <b>46e</b>              | 2,4-diMe | 0.6524                |
| <b>46f</b>              | 2,3-diMe | 0.7379                |
| <b>46g</b>              | 3-Me     | 1.0103                |
| <b>46h</b>              | 2,6-diMe | 1.6139                |
| kojic acid ( <b>5</b> ) |          | 16.8319               |

**Table S25.** Thiazolidinone derivatives, see **Figure 29** (Azo-hydrazone tautomeric dyes bearing a thiazolidinone moiety derivatives).

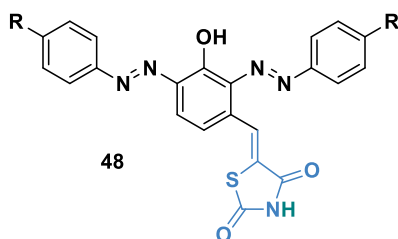

| Compound                | R               | IC <sub>50</sub> (μM) |
|-------------------------|-----------------|-----------------------|
| <b>48a</b>              | OMe             | 37.59                 |
| <b>48b</b>              | NO <sub>2</sub> | 42.31                 |
| <b>48c</b>              | Me              | 45.83                 |
| <b>48d</b>              | CN              | 61.92                 |
| <b>48e</b>              | Br              | 140.25                |
| kojic acid ( <b>5</b> ) |                 | 29.44                 |

**Table S26.** Thiazole derivatives, see **Figure 31a** (TYRIs containing hydrazinyl thiazole moieties).

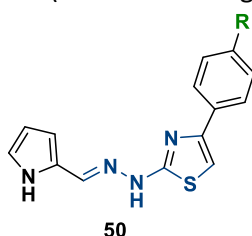

| Compound   | R   | IC <sub>50</sub> (μM) |
|------------|-----|-----------------------|
| <b>50a</b> | F   | 21.45                 |
| <b>50b</b> | Br  | 6.06                  |
| <b>50c</b> | OMe | 5.94                  |
| <b>50d</b> | H   | 5.81                  |
| <b>50e</b> | Cl  | 4.95                  |

|                |  |      |
|----------------|--|------|
| kojic acid (5) |  | 4.43 |
|----------------|--|------|

**Table S27.** Thiazole derivatives, see **Figure 31b** (TYRIs containing hydrazinyl thiazole moieties).

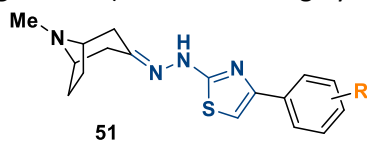

| Compound          | R                             | IC <sub>50</sub> (μM) |
|-------------------|-------------------------------|-----------------------|
| <b>51a</b>        | 3,4-diCl-phenyl               | 3.22                  |
| <b>51b</b>        | 2,4-diCl-phenyl               | 3.51                  |
| <b>51c</b>        | 4-CF <sub>3</sub> -phenyl     | 33.74                 |
| <b>51d</b>        | N <sub>3</sub> -phenyl        | 72.30                 |
| <b>51e</b>        | 4-Br-phenyl                   | 84.97                 |
| <b>51f</b>        | 4-Me-phenyl                   | 101.2                 |
| <b>51g</b>        | 4-NH <sub>2</sub> -phenyl     | 118.06                |
| <b>51h</b>        | NHCOMe-phenyl                 | 120.71                |
| <b>51i</b>        | 4-F-phenyl                    | 123.1                 |
| <b>51j</b>        | 4-Cl-phenyl                   | 132.7                 |
| <b>51k</b>        | 4-NO <sub>2</sub> -phenyl     | 140.21                |
| <b>51l</b>        | 4-I-phenyl                    | 151.44                |
| <b>51m</b>        | 4-NHSO <sub>2</sub> Me-phenyl | 152.04                |
| <b>51n</b>        | 4-CN-phenyl                   | 153.04                |
| <b>51o</b>        | 4-OMe-phenyl                  | 165.38                |
| <b>51p</b>        | 2 <i>H</i> -chromen-2-one     | 183.34                |
| Ascorbic acid (7) |                               | 386.5                 |
| kojic acid (5)    |                               | 72.27                 |

**Table S28.** 2-Benzothiazole-linked thiourea derivatives, see **Figure 32** (2-Benzothiazole-linked thioureas with inhibitory activity towards TYR).

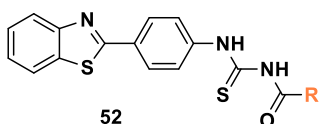

| Compound       | R                             | IC <sub>50</sub> (μM) |
|----------------|-------------------------------|-----------------------|
| <b>52a</b>     | nonyl                         | 1.3431                |
| <b>52b</b>     | heptyl                        | 1.3526                |
| <b>52c</b>     | pentyl                        | 2.6841                |
| <b>52d</b>     | octyl                         | 4.1576                |
| <b>52e</b>     | 3,5-diNO <sub>2</sub> -phenyl | 4.7745                |
| <b>52f</b>     | propyl                        | 6.0986                |
| <b>52g</b>     | <i>t</i> -Bu                  | 7.8319                |
| <b>52h</b>     | 2,4-diCl-phenyl               | 19.0153               |
| <b>52i</b>     | 4-OMe-phenyl                  | 54.6311               |
| kojic acid (5) |                               | 16.8320               |

**Table S29.** Benzylidenethiochroman-4-one derivatives, see **Figure 33** (Rational design of TYRIs bearing the benzylidenethiochroman-4-one scaffold).

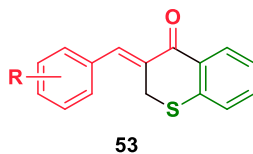

| Compound                | R              | PI (%) | IC <sub>50</sub> (μM) |
|-------------------------|----------------|--------|-----------------------|
| <b>53a</b>              | 3-OH,4-OMe     | 91.5   | 4.1                   |
| <b>53b</b>              | 3-Br,4-OH      | 90.7   | -                     |
| <b>53c</b>              | 3,4-diOH       | 45.0   | -                     |
| <b>53d</b>              | 3-OMe,4-OH     | 25.8   | -                     |
| <b>53e</b>              | 2,4-diOMe      | 20.3   | -                     |
| <b>53f</b>              | 3,5-diOMe,4-OH | 15.6   | -                     |
| <b>53g</b>              | 3,5-diBr,4-OH  | 8.5    | -                     |
| kojic acid ( <b>5</b> ) |                | 77.5   | 22.0                  |

**Table S30.** ((Z)-5-(Substituted benzylidene)-4-thioxothiazolidin-2-one derivatives, see **Figure 34** ((Z)-5-(Substituted benzylidene)-4-thioxothiazolidin-2-one derivatives (**56**) as tyrosinase inhibitors).

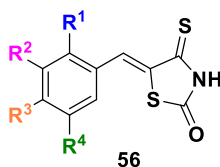

| Compound                | R <sup>1</sup> | R <sup>2</sup> | R <sup>3</sup> | R <sup>4</sup> | IC <sub>50</sub> (μM) |
|-------------------------|----------------|----------------|----------------|----------------|-----------------------|
| <b>56a</b>              | OH             | H              | OH             | H              | 0.47                  |
| <b>56b</b>              | H              | OH             | OMe            | H              | 15.24                 |
| <b>56c</b>              | H              | OMe            | OMe            | H              | 23.31                 |
| <b>56d</b>              | H              | Br             | OH             | H              | 26.27                 |
| <b>56e</b>              | H              | H              | OH             | H              | 28.05                 |
| <b>56f</b>              | H              | H              | OMe            | H              | 30.83                 |
| <b>56g</b>              | H              | OH             | OH             | H              | 47.41                 |
| <b>56h</b>              | H              | OMe            | OH             | H              | 70.75                 |
| <b>56i</b>              | H              | OMe            | OH             | OMe            | 82.39                 |
| <b>56l</b>              | H              | OEt            | OH             | H              | 92.81                 |
| <b>56m</b>              | OMe            | H              | OMe            | H              | 126.35                |
| <b>56n</b>              | OH             | H              | H              | H              | 147.61                |
| kojic acid ( <b>5</b> ) |                |                |                |                | 66.30                 |

**Table S31.** (Z)-5-(Substituted benzylidene)-3-phenyl-2-thioxothiazolidin-4-one derivatives, see **Figure 35** (Z)-5-(Substituted benzylidene)-3-phenyl-2-thioxothiazolidin-4-one derivatives **57**, that showed promising inhibitory characteristics).

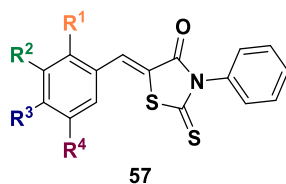

| Compound | R <sup>1</sup> | R <sup>2</sup> | R <sup>3</sup> | R <sup>4</sup> | IC <sub>50</sub> (μM) |
|----------|----------------|----------------|----------------|----------------|-----------------------|
|----------|----------------|----------------|----------------|----------------|-----------------------|

|                         |     |     |     |     |       |
|-------------------------|-----|-----|-----|-----|-------|
| <b>57a</b>              | OH  | H   | OH  | H   | 0.59  |
| <b>57b</b>              | H   | OH  | OH  | H   | 1.38  |
| <b>57c</b>              | H   | H   | OH  | H   | 1.45  |
| <b>57d</b>              | H   | OH  | OMe | H   | 1.88  |
| <b>57e</b>              | OMe | H   | OMe | H   | 22.15 |
| <b>57f</b>              | H   | Br  | OH  | H   | 65.54 |
| <b>57g</b>              | H   | Br  | OH  | Br  | 78.75 |
| <b>57h</b>              | H   | OMe | OH  | H   | 80.03 |
| <b>57i</b>              | H   | OMe | OMe | H   | 94.29 |
| <b>57j</b>              | H   | H   | OMe | H   | >200  |
| <b>57k</b>              | H   | OMe | OMe | OMe | >200  |
| <b>57l</b>              | H   | OMe | OH  | OMe | >200  |
| <b>57m</b>              | H   | OEt | OH  | H   | >200  |
| kojic acid ( <b>5</b> ) |     |     |     |     | 17.05 |

**Table S32.** 2-(Aryl)-5-(trifluoromethyl)benzo[d]thiazoles, see **Figure 36** (Inhibitory activities towards TYR of 2-(aryl)-5-(trifluoromethyl)benzo[d]thiazoles **58**).

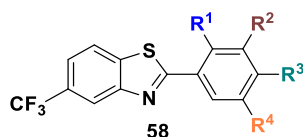

| Compound                | R <sup>1</sup> | R <sup>2</sup> | R <sup>3</sup> | R <sup>4</sup> | IC <sub>50</sub> (μM) |
|-------------------------|----------------|----------------|----------------|----------------|-----------------------|
| <b>58a</b>              | OH             | H              | OH             | H              | 0.2                   |
| <b>58b</b>              | H              | H              | OH             | H              | 52.4                  |
| <b>58c</b>              | H              | Br             | OH             | H              | 101.9                 |
| <b>58d</b>              | H              | Me             | OH             | Me             | 128.9                 |
| <b>58e</b>              | H              | OH             | H              | OH             | 216.5                 |
| <b>58f</b>              | H              | OMe            | OMe            | H              | 263.9                 |
| <b>58g</b>              | H              | OMe            | OH             | H              | 291.1                 |
| <b>58h</b>              | H              | OH             | OMe            | H              | >300                  |
| <b>58i</b>              | OH             | H              | H              | H              | >300                  |
| <b>58j</b>              | H              | H              | OMe            | H              | >300                  |
| <b>58k</b>              | OMe            | H              | OMe            | H              | >300                  |
| <b>58l</b>              | H              | Br             | OH             | Br             | >300                  |
| <b>58m</b>              | H              | OEt            | OH             | H              | >300                  |
| <b>58n</b>              | H              | OMe            | OMe            | OMe            | >300                  |
| <b>58o</b>              | H              | OMe            | OH             | OMe            | >300                  |
| <b>58p</b>              | H              | OH             | OH             | H              | >300                  |
| kojic acid ( <b>5</b> ) |                |                |                |                | 12.6                  |

**Table S33.** ((Z)-2-Benzylidene-dihydroimidazothiazolone derivatives, see **Figure 37a** ((Z)-2-Benzylidene-dihydroimidazothiazolone derivatives (**59**) (a)).

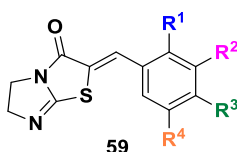

| Compound   | R <sup>1</sup> | R <sup>2</sup> | R <sup>3</sup> | R <sup>4</sup> | IC <sub>50</sub> (μM) |
|------------|----------------|----------------|----------------|----------------|-----------------------|
| <b>59a</b> | OH             | H              | OH             | H              | 0.88                  |



|                         |     |     |     |     |       |
|-------------------------|-----|-----|-----|-----|-------|
| <b>59b</b>              | H   | OH  | OMe | H   | 17.10 |
| <b>59c</b>              | H   | H   | OH  | H   | 36.14 |
| <b>59d</b>              | H   | OH  | OH  | H   | >100  |
| <b>59e</b>              | H   | OMe | OH  | H   | >100  |
| <b>59f</b>              | H   | OEt | OH  | H   | >100  |
| <b>59g</b>              | H   | H   | OMe | H   | >100  |
| <b>59h</b>              | OMe | H   | OMe | H   | >100  |
| <b>59i</b>              | H   | OMe | OMe | H   | >100  |
| <b>59j</b>              | H   | OMe | OH  | OMe | >100  |
| <b>59k</b>              | H   | OMe | OMe | OMe | >100  |
| kojic acid ( <b>5</b> ) |     |     |     |     | 84.41 |

**Table S34.** ((Z)-2-(Benzylamino)-5-benzylidenethiazol-4(5H)-one derivatives, see **Figure 37b** ((Z)-2-(Benzylamino)-5-benzylidenethiazol-4(5H)-one derivatives (**60**) (b)).

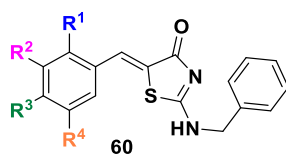

| Compound                | R <sup>1</sup> | R <sup>2</sup> | R <sup>3</sup> | R <sup>4</sup> | IC <sub>50</sub> (μM) |       |
|-------------------------|----------------|----------------|----------------|----------------|-----------------------|-------|
| <b>60a</b>              | OH             | H              | OH             | H              | 0.27                  | 1.04  |
| <b>60b</b>              | H              | OH             | OMe            | H              | 10.0                  | 10.3  |
| <b>60c</b>              | H              | H              | OH             | H              | 27.5                  | 65.1  |
| <b>60d</b>              | OMe            | H              | OMe            | H              | 293.3                 | 213.6 |
| <b>60e</b>              | H              | OMe            | OMe            | OMe            | 192.4                 | 231.1 |
| <b>60f</b>              | H              | H              | OMe            | H              | 125.5                 | 239.4 |
| <b>60g</b>              | H              | OEt            | OH             | H              | 198.9                 | 248.1 |
| <b>60h</b>              | F              | H              | F              | H              | >300                  | >300  |
| <b>60i</b>              | H              | F              | F              | H              | 288.7                 | >300  |
| <b>60j</b>              | H              | OMe            | OH             | H              | 148.3                 | >300  |
| <b>60k</b>              | H              | OMe            | OMe            | H              | >300                  | >300  |
| <b>60l</b>              | H              | OMe            | OH             | OMe            | 166.0                 | >300  |
| <b>60m</b>              | H              | t-Bu           | OH             | t-Bu           | 136.7                 | >300  |
| <b>60n</b>              | H              | OH             | OH             | H              | >300                  | >300  |
| kojic acid ( <b>5</b> ) |                |                |                |                | 28.6                  | 20.1  |

**Table S35.** Hydroxypyridinone derivatives, see **Figure 39** (Hydroxypyridinone-based TYRIs (**63**) bearing an oxime moiety).

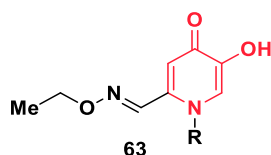

| Compound   | R               | IC <sub>50</sub> monophenolase (μM) | IC <sub>50</sub> diphenolase (μM) |
|------------|-----------------|-------------------------------------|-----------------------------------|
| <b>63a</b> | <i>n</i> -Octyl | 1.60                                | 7.99                              |
| <b>63b</b> | <i>n</i> -Hexyl | 2.04                                | 13.89                             |
| <b>63c</b> | <i>n</i> -Bu    | 4.78                                | -                                 |
| <b>63d</b> | Et              | 7.45                                | -                                 |
| <b>63e</b> | Me              | 19.65                               | -                                 |

|                |   |       |   |
|----------------|---|-------|---|
| <b>63f</b>     | H | 22.87 | - |
| kojic acid (5) |   | 12.24 | - |

**Table S36.** Hydroxypyridinones, see **Figure 40** (TYRIs bearing a chalcone-hydroxypyridinone scaffold)

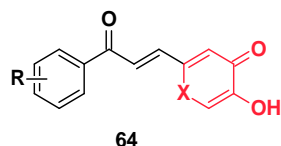

| Compound       | R                        | X                              | PI (%) | IC <sub>50</sub> monophenolase (μM) | IC <sub>50</sub> diphenolase (μM) |
|----------------|--------------------------|--------------------------------|--------|-------------------------------------|-----------------------------------|
| <b>64a</b>     | 4-F                      | NH                             | 89.5   | 2.25                                | 11.7                              |
| <b>64b</b>     | 3,4-diOCH <sub>3</sub>   | NH                             | 87.6   | 2.75                                | 19.3                              |
| <b>64c</b>     | 4-F                      | NCH <sub>3</sub>               | 85.3   | 3.07                                | 17.1                              |
| <b>64d</b>     | 3,4-diOH                 | NC <sub>2</sub> H <sub>5</sub> | 78.8   | 8.11                                | -                                 |
| <b>64e</b>     | H                        | NCH <sub>3</sub>               | 72.8   | -                                   | -                                 |
| <b>64f</b>     | 2-OH, 4-OCH <sub>3</sub> | NC <sub>2</sub> H <sub>5</sub> | 71.4   | -                                   | -                                 |
| <b>64g</b>     | 3,4-diOH                 | NC <sub>4</sub> H <sub>9</sub> | 69.4   | -                                   | -                                 |
| <b>64h</b>     | 2-OH, 4-OCH <sub>3</sub> | NCH <sub>3</sub>               | 66.7   | -                                   | -                                 |
| <b>64i</b>     | H                        | NH                             | 66.7   | -                                   | -                                 |
| <b>64j</b>     | 2-OH, 4-OCH <sub>3</sub> | NC <sub>4</sub> H <sub>9</sub> | 64.6   | -                                   | -                                 |
| <b>64k</b>     | H                        | NC <sub>2</sub> H <sub>5</sub> | 63.3   | -                                   | -                                 |
| <b>64l</b>     | 3,4-diOCH <sub>3</sub>   | NH                             | 63.3   | -                                   | -                                 |
| <b>64m</b>     | 4-F                      | NC <sub>2</sub> H <sub>5</sub> | 57.8   | -                                   | -                                 |
| <b>64n</b>     | 2,4-diOCH <sub>3</sub>   | O                              | 50.3   | -                                   | -                                 |
| <b>64o</b>     | 4-F                      | NC <sub>4</sub> H <sub>9</sub> | 50.3   | -                                   | -                                 |
| kojic acid (5) |                          |                                | 75.4   | -                                   | -                                 |

**Table S37.** Hydroxypyridinones, see **Figure 41** (TYR-inhibitory profile of stilbene-hydroxypyridinone hybrids).

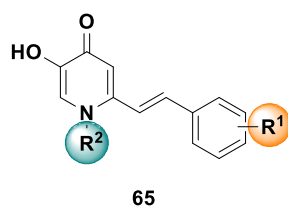

| Compound       | R <sup>1</sup> | R <sup>2</sup>                           | IC <sub>50</sub> monophenolase (μM) | IC <sub>50</sub> diphenolase (μM) |
|----------------|----------------|------------------------------------------|-------------------------------------|-----------------------------------|
| <b>65a</b>     | 3,5-diOH       | <i>n</i> -C <sub>6</sub> H <sub>13</sub> | 2.72                                | 15.86                             |
| <b>65b</b>     | 3,4-di-OH      | <i>n</i> -C <sub>6</sub> H <sub>13</sub> | 3.83                                | -                                 |
| <b>65c</b>     | 4-OH           | <i>n</i> -C <sub>6</sub> H <sub>13</sub> | 5.27                                | -                                 |
| <b>65d</b>     | 3,5-diOH       | <i>n</i> -C <sub>4</sub> H <sub>9</sub>  | 6.35                                | -                                 |
| <b>65e</b>     | 3,4-diOH       | <i>n</i> -C <sub>4</sub> H <sub>9</sub>  | 7.45                                | -                                 |
| <b>65f</b>     | 4-OH           | <i>n</i> -C <sub>4</sub> H <sub>9</sub>  | 7.62                                | -                                 |
| <b>65g</b>     | 3,5-diOH       | <i>n</i> -C <sub>8</sub> H <sub>17</sub> | 9.31                                | -                                 |
| <b>65h</b>     | 3,4-diOH       | <i>n</i> -C <sub>8</sub> H <sub>17</sub> | 12.26                               | -                                 |
| <b>65i</b>     | 4-OH           | <i>n</i> -C <sub>8</sub> H <sub>17</sub> | 16.32                               | -                                 |
| kojic acid (5) |                |                                          | 12.52                               | -                                 |

**Table S38.** Quinoline derivatives, see **Figure 42** (Dihydroquinolinones and their TYR inhibitory behavior).

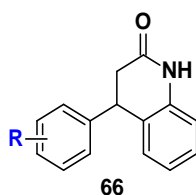

| Compound                | R          | PI (%) |
|-------------------------|------------|--------|
| <b>66a</b>              | 3-OH,4-OMe | 25.94  |
| <b>66b</b>              | 4-OH       | -      |
| <b>66c</b>              | 3,4-diOH   | -      |
| <b>66d</b>              | 3-OMe,4-OH | -      |
| kojic acid ( <b>5</b> ) |            | 21.39  |

**Table S39.** Quinoline derivatives, see **Figure 44** (Quinolinyln based acyl thiourea derivatives).

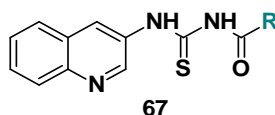

| Compound                | R                         | IC <sub>50</sub> (μM) |
|-------------------------|---------------------------|-----------------------|
| <b>67a</b>              | <i>n</i> -pentyl          | 0.0070                |
| <b>67b</b>              | phenyl                    | 0.0148                |
| <b>67c</b>              | 3,5-diNO <sub>2</sub> -Ph | 0.1099                |
| <b>67d</b>              | <i>n</i> -hexyl           | 0.1105                |
| <b>67e</b>              | <i>n</i> -heptyl          | 0.1149                |
| <b>67f</b>              | 4-Me-Ph                   | 0.1275                |
| <b>67g</b>              | <i>n</i> -nonyl           | 0.2685                |
| <b>67h</b>              | <i>n</i> -butyl           | 0.4196                |
| <b>67i</b>              | 2,4-diCl-Ph               | 0.7656                |
| <b>67j</b>              | <i>n</i> -propyl          | 1.9737                |
| kojic acid ( <b>5</b> ) |                           | 16.8320               |

**Table S40.** Pyrimidine-based derivatives, see **Figure 44** (Azo-pyrimidine derivatives that were tested on their inhibitory activity on TYR).

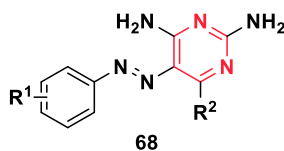

| Compound   | R <sup>1</sup>    | R <sup>2</sup>  | IC <sub>50</sub> (μM) |
|------------|-------------------|-----------------|-----------------------|
| <b>68a</b> | 4-NHCOMe          | Cl              | 24.45                 |
| <b>68b</b> | 2-NO <sub>2</sub> | Cl              | 24.68                 |
| <b>68c</b> | 4-OMe             | Cl              | 28.01                 |
| <b>68d</b> | 4-NHCOMe          | NH <sub>2</sub> | 29.77                 |
| <b>68e</b> | 2-NO <sub>2</sub> | NH <sub>2</sub> | 34.06                 |
| <b>68f</b> | 4-NO <sub>2</sub> | Cl              | 37.191                |
| <b>68g</b> | 4-NO <sub>2</sub> | NH <sub>2</sub> | 40.62                 |
| <b>68h</b> | 4-Me              | NH <sub>2</sub> | 41.4                  |

|                         |       |                 |       |
|-------------------------|-------|-----------------|-------|
| <b>68i</b>              | 4-Me  | Cl              | 42.04 |
| <b>68j</b>              | 4-OMe | NH <sub>2</sub> | 43.8  |
| kojic acid ( <b>5</b> ) |       |                 | 25.24 |

**Table S41.** Pyrimidine-based derivatives, see **Figure 45** (TYRIs bearing the pyranopyrimidine and the pyranotriazolopyrimidine scaffolds).

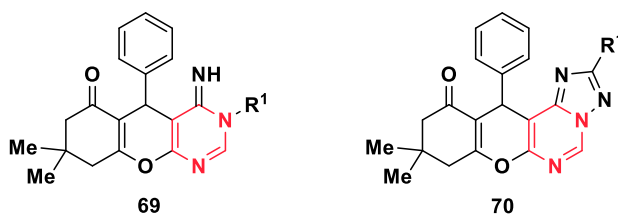

| Compound                | R <sup>1</sup>                      | PI (%) |
|-------------------------|-------------------------------------|--------|
| <b>69a</b>              | 3-Cl-Ph                             | 94.23  |
| <b>69b</b>              | Ph                                  | 91.35  |
| <b>69c</b>              | 4-C <sub>2</sub> H <sub>5</sub> -Ph | 84.14  |
| <b>69d</b>              | 4-Me-Ph                             | -      |
| <b>69e</b>              | 1-naphtyl                           | -      |
| <b>69f</b>              | 4-OMe-Ph                            | -      |
| <b>70a</b>              | CH <sub>2</sub> CN                  | 93.94  |
| <b>70b</b>              |                                     | 90.12  |
| <b>70c</b>              | H                                   | 78.09  |
| <b>70d</b>              | Me                                  | -      |
| kojic acid ( <b>5</b> ) |                                     | 85.50  |

**Table S42.** Pyrimidine-based derivatives, see **Figure 47** (Tetrahydrobenzo[4,5]thieno[2,3-d]pyrimidine-4(3*H*)-one derivatives **72**, which are substituted in the 2-position).

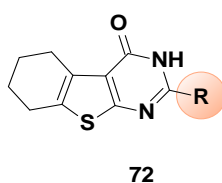

| Compound                | R              | IC <sub>50</sub> (mM) |
|-------------------------|----------------|-----------------------|
| <b>72a</b>              | 2,4-diOH-Ph    | 0.51                  |
| <b>72b</b>              | 4-OH-Ph        | 0.70                  |
| <b>72c</b>              | 2-OH-Ph        | 0.87                  |
| <b>72d</b>              | Ph             | 1.11                  |
| <b>72e</b>              | 2-OH,3-OMe-Ph4 | 1.57                  |
| <b>72f</b>              | 3-OMe,4-OH     | 2.04                  |
| <b>72g</b>              | 3-Me-furan     | 2.10                  |
| <b>72h</b>              | <i>t</i> Bu-Ph | 2.11                  |
| <b>72i</b>              | 4-Me-Ph        | 2.25                  |
| <b>72j</b>              | 4-OMe-Ph       | 2.34                  |
| <b>72k</b>              | 4-OMe,3-OH     | 2.45                  |
| <b>72l</b>              | furan          | 3.03                  |
| kojic acid ( <b>5</b> ) |                | 0.32                  |

**Table S43.** Oxoquinazoline derivatives, see **Figure 48** (Oxoquinazoline derivatives **73** and their potential in inhibition of TYR).

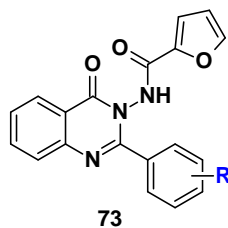

| Compound                | R                                                         | IC <sub>50</sub> (μM) |
|-------------------------|-----------------------------------------------------------|-----------------------|
| <b>73a</b>              | 2-OH,3,5-diBr                                             | 0.028                 |
| <b>73b</b>              | 2-OH,3-NO <sub>2</sub>                                    | 0.031                 |
| <b>73c</b>              | 2-OH,5-Cl                                                 | 0.052                 |
| <b>73d</b>              | 2-OH,3,5diI                                               | 0.055                 |
| <b>73e</b>              | 2,4-diOH                                                  | 0.056                 |
| <b>73f</b>              | 2-OH,5-br                                                 | 0.063                 |
| <b>73g</b>              | 2-OH                                                      | 0.499                 |
| <b>73h</b>              | 2-OH,3,5-diCl                                             | 0.627                 |
| <b>73i</b>              | 2-OH,4-(CH <sub>3</sub> CH <sub>2</sub> ) <sub>2</sub> NH | 1.218                 |
| <b>73j</b>              | 2-OH,5-OMe                                                | 1.775                 |
| kojic acid ( <b>5</b> ) |                                                           | 16.832                |

**Table S44.** Piperazines, see **Figure 50** (Further 4-fluorobenzylpiperazine derivatives (**78**) which were identified as TYRIs).

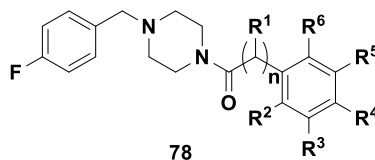

| Compound   | <i>n</i> | R <sup>1</sup> | R <sup>2</sup>  | R <sup>3</sup>  | R <sup>4</sup>  | R <sup>5</sup> | R <sup>6</sup> | IC <sub>50</sub> (μM) |
|------------|----------|----------------|-----------------|-----------------|-----------------|----------------|----------------|-----------------------|
| <b>78a</b> | 0        | H              | NO <sub>2</sub> | Cl              | H               | H              | H              | 0.18                  |
| <b>78b</b> | 0        | H              | CF <sub>3</sub> | H               | H               | F              | H              | 0.24                  |
| <b>78c</b> | 0        | H              | CF <sub>3</sub> | F               | H               | H              | H              | 0.45                  |
| <b>78d</b> | 0        | H              | CF <sub>3</sub> | H               | F               | H              | H              | 0.87                  |
| <b>78e</b> | 0        | H              | NO <sub>2</sub> | H               | H               | OMe            | H              | 1.11                  |
| <b>78f</b> | 0        | H              | NO <sub>2</sub> | H               | H               | H              | Cl             | 1.17                  |
| <b>78g</b> | 1        | H              | H               | H               | NO <sub>2</sub> | H              | H              | 1.71                  |
| <b>78h</b> | 0        | H              | NO <sub>2</sub> | H               | OMe             | H              | H              | 1.80                  |
| <b>78i</b> | 0        | H              | NO <sub>2</sub> | H               | H               | Cl             | H              | 2.01                  |
| <b>78j</b> | 0        | H              | NO <sub>2</sub> | OMe             | H               | H              | H              | 2.09                  |
| <b>78k</b> | 0        | H              | NO <sub>2</sub> | H               | Cl              | H              | H              | 2.27                  |
| <b>78l</b> | 1        | H              | H               | H               | NO <sub>2</sub> | H              | H              | 3.74                  |
| <b>78m</b> | 1        | H              | H               | H               | H               | H              | H              | 4.28                  |
| <b>78n</b> | 1        | H              | H               | Cl              | H               | H              | H              | 4.66                  |
| <b>78o</b> | 1        | H              | Br              | H               | H               | H              | H              | 4.70                  |
| <b>78p</b> | 1        | H              | H               | H               | Cl              | H              | H              | 4.71                  |
| <b>78q</b> | 1        | H              | H               | H               | Br              | H              | H              | 7.66                  |
| <b>78r</b> | 1        | H              | NO <sub>2</sub> | H               | H               | H              | H              | 8.31                  |
| <b>78s</b> | 1        | H              | H               | NO <sub>2</sub> | H               | H              | H              | 8.66                  |

|                         |   |    |    |                 |                 |   |   |       |
|-------------------------|---|----|----|-----------------|-----------------|---|---|-------|
| <b>78t</b>              | 1 | H  | Cl | H               | H               | H | H | 8.70  |
| <b>78u</b>              | 1 | H  | H  | NH <sub>2</sub> | H               | H | H | 9.36  |
| <b>78v</b>              | 2 | H  | H  | H               | H               | H | H | 13.17 |
| <b>78w</b>              | 1 | H  | H  | Br              | H               | H | H | 15.74 |
| <b>78x</b>              | 1 | H  | H  | H               | NH <sub>2</sub> | H | H | 16.73 |
| <b>78y</b>              | 1 | H  | H  | H               | OMe             | H | H | 19.63 |
| <b>78z</b>              | 1 | Ph | H  | H               | H               | H | H | 40.43 |
| kojic acid ( <b>5</b> ) |   |    |    |                 |                 |   |   | 17.76 |

**Table S45.** Piperazines, see **Figure 51a** (Phenylpiperazine TYRIs (**79** - **81**) from various studies).

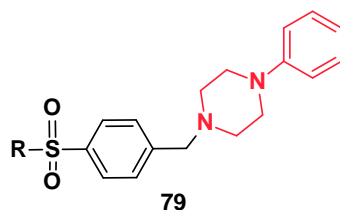

| Compound                | R                          | IC <sub>50</sub> (μM) |
|-------------------------|----------------------------|-----------------------|
| <b>79a</b>              | 1-piperidinyl              | 0.06                  |
| <b>79b</b>              | 3,5-dimethyl-1-piperidinyl | 0.07                  |
| <b>79c</b>              | 4-methyl-1-piperidinyl     | 0.14                  |
| <b>79d</b>              | 4-morpholinyl              | 0.41                  |
| kojic acid ( <b>5</b> ) |                            | 16.83                 |

**Table S46.** Piperazines, see **Figure 51b** (Phenylpiperazine TYRIs (**79** - **81**) from various studies).

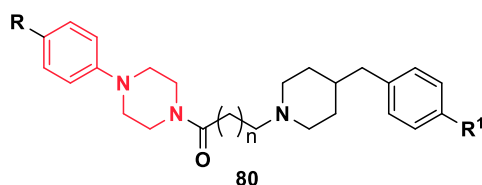

| Compound                | <i>n</i> | R  | R <sup>1</sup> | IC <sub>50</sub> (μM) |
|-------------------------|----------|----|----------------|-----------------------|
| <b>80a</b>              | 0        | OH | H              | 3.80                  |
| <b>80b</b>              | 1        | OH | H              | 4.03                  |
| <b>80c</b>              | 0        | OH | F              | 4.49                  |
| <b>80d</b>              | 1        | OH | F              | 6.06                  |
| <b>80e</b>              | 0        | H  | F              | 9.60                  |
| <b>80f</b>              | 1        | F  | F              | 23.36                 |
| <b>80g</b>              | 1        | H  | H              | 57.50                 |
| <b>80h</b>              | 0        | H  | H              | 80.86                 |
| kojic acid ( <b>5</b> ) |          |    |                | 17.76                 |

**Table S47.** Piperazines, see **Figure 51c** (Phenylpiperazine TYRIs (**79** - **81**) from various studies).

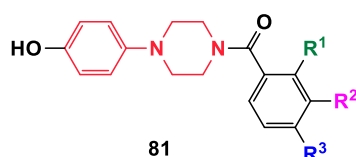

| Compound                | R <sup>1</sup>  | R <sup>2</sup>  | R <sup>3</sup>  | IC <sub>50</sub> (μM) |
|-------------------------|-----------------|-----------------|-----------------|-----------------------|
| <b>81a</b>              | Cl              | H               | Cl              | 1.5                   |
| <b>81b</b>              | Cl              | H               | H               | 2.6                   |
| <b>81c</b>              | OMe             | H               | H               | 3.5                   |
| <b>81d</b>              | Br              | H               | H               | 4.5                   |
| <b>81e</b>              | CF <sub>3</sub> | H               | H               | 4.6                   |
| <b>81f</b>              | H               | CF <sub>3</sub> | H               | 5.5                   |
| <b>81g</b>              | NO <sub>2</sub> | H               | H               | 7.4                   |
| <b>81h</b>              | NO <sub>2</sub> | H               | NO <sub>2</sub> | 7.6                   |
| <b>81i</b>              | H               | H               | Cl              | 8.9                   |
| <b>81l</b>              | H               | Cl              | H               | 9.0                   |
| <b>81j</b>              | Br              | H               | Br              | 9.5                   |
| <b>81m</b>              | H               | OMe             | H               | 9.8                   |
| <b>81n</b>              | H               | H               | OMe             | 14.9                  |
| <b>81o</b>              | F               | H               | H               | 15.2                  |
| <b>81p</b>              | H               | Br              | H               | 16.4                  |
| <b>81q</b>              | OMe             | H               | OMe             | 16.7                  |
| <b>81r</b>              | F               | H               | F               | 17.5                  |
| <b>81s</b>              | CF <sub>3</sub> | H               | CF <sub>3</sub> | 18.2                  |
| <b>81t</b>              | H               | H               | F               | 21.7                  |
| <b>81u</b>              | H               | NO <sub>2</sub> | H               | 21.8                  |
| <b>81v</b>              | H               | F               | H               | 22.6                  |
| <b>81w</b>              | H               | H               | NO <sub>2</sub> | 23.2                  |
| <b>81x</b>              | Me              | H               | H               | 29.9                  |
| <b>81y</b>              | H               | Me              | H               | 31.7                  |
| <b>81z</b>              | Me              | H               | Me              | 33.7                  |
| <b>81aa</b>             | H               | H               | Me              | 34.4                  |
| <b>81bb</b>             | H               | H               | CF <sub>3</sub> | 35.1                  |
| <b>81cc</b>             | H               | NH <sub>2</sub> | H               | 35.7                  |
| <b>81dd</b>             | H               | H               | Br              | 39.6                  |
| <b>81ee</b>             | H               | H               | NH <sub>2</sub> | 43.9                  |
| <b>81ff</b>             | NH <sub>2</sub> | H               | H               | 66.4                  |
| <b>81gg</b>             | H               | H               | H               | 73.2                  |
| <b>81hh</b>             | NH <sub>2</sub> | H               | NH <sub>2</sub> | 82.4                  |
| <b>81ii</b>             | H               | H               | Ph              | 128.3                 |
| kojic acid ( <b>5</b> ) |                 |                 |                 | 17.76                 |

**Table S48.** Piperazines, see **Figure 52** (Piperazinyl butanamide-containing TYRIs).

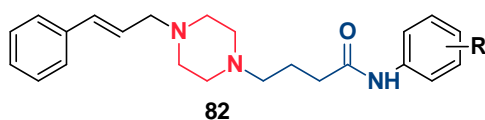

| Compound                | R        | IC <sub>50</sub> (μM) |
|-------------------------|----------|-----------------------|
| <b>79a</b>              | 2,4-diMe | 0.01                  |
| <b>79b</b>              | 2,3-diMe | 0.02                  |
| <b>79c</b>              | 3-Me     | 0.04                  |
| <b>79d</b>              | 4-Me     | 0.05                  |
| <b>79e</b>              | 4-Et     | 0.68                  |
| kojic acid ( <b>5</b> ) |          | 16.84                 |

**Table S49.** Piperazines, see **Figure 53** (Cinnamic acid derivatives linked to aryl piperazines).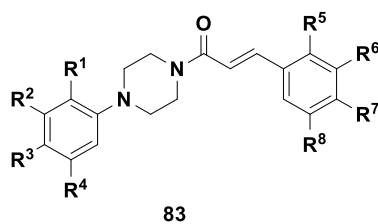

| Compound                | R <sup>1</sup> | R <sup>2</sup> | R <sup>3</sup> | R <sup>4</sup> | R <sup>5</sup>  | R <sup>6</sup>     | R <sup>7</sup>     | R <sup>8</sup> | IC <sub>50</sub> (μM) |
|-------------------------|----------------|----------------|----------------|----------------|-----------------|--------------------|--------------------|----------------|-----------------------|
| <b>83a</b>              | H              | Cl             | F              | H              | H               | NO <sub>2</sub>    | H                  | H              | 0.16                  |
| <b>83b</b>              | H              | Cl             | F              | H              | Cl              | OMe                | H                  | H              | 0.12                  |
| <b>83c</b>              | H              | Cl             | F              | H              | NO <sub>2</sub> | OMe                | H                  | H              | 0.51                  |
| <b>83d</b>              | H              | Cl             | F              | H              | H               | OMe                | H                  | H              | 0.25                  |
| <b>83e</b>              | H              | Cl             | F              | H              | H               | H                  | Cl                 | H              | 0.33                  |
| <b>83f</b>              | H              | Cl             | F              | H              | H               | H                  | NO <sub>2</sub>    | H              | 0.35                  |
| <b>83g</b>              | H              | Cl             | F              | H              | OMe             | H                  | H                  | Cl             | 0.46                  |
| <b>83h</b>              | H              | Cl             | F              | H              | H               | NH <sub>2</sub>    | OMe                | H              | 0.53                  |
| <b>83i</b>              | H              | F              | F              | H              | H               | NH <sub>2</sub>    | OMe                | H              | 6.84                  |
| <b>83j</b>              | H              | H              | F              | H              | H               | OMe                | H                  | H              | 9.96                  |
| <b>83k</b>              | H              | H              | F              | H              | H               | H                  | Cl                 | H              | 14.09                 |
| <b>83l</b>              | H              | F              | F              | H              | H               | NH <sub>2</sub>    | OMe                | H              | 15.47                 |
| <b>83m</b>              | H              | H              | F              | H              | H               | NH <sub>2</sub>    | OMe                | H              | 17.85                 |
| <b>83n</b>              | H              | H              | F              | H              | H               | NO <sub>2</sub>    | H                  | H              | 23.32                 |
| <b>83o</b>              | OMe            | H              | H              | H              | H               | H                  | H                  | Cl             | 27.40                 |
| <b>83p</b>              | H              | Cl             | H              | H              | H               | OCH <sub>2</sub> O | OCH <sub>2</sub> O | H              | 34.25                 |
| <b>83q</b>              | H              | F              | H              | H              | H               | NH <sub>2</sub>    | OMe                | H              | >100                  |
| <b>83r</b>              | H              | H              | F              | H              | H               | H                  | NO <sub>2</sub>    | H              | NI                    |
| <b>83s</b>              | H              | H              | F              | H              | H               | OCH <sub>2</sub> O | OCH <sub>2</sub> O | H              | NI                    |
| <b>83t</b>              | H              | H              | F              | H              | H               | OBn                | NO <sub>2</sub>    | H              | NI                    |
| <b>83u</b>              | H              | H              | F              | H              | H               | NO <sub>2</sub>    | OMe                | H              | NI                    |
| <b>83v</b>              | H              | F              | H              | H              | H               | NO <sub>2</sub>    | OMe                | H              | NI                    |
| <b>83w</b>              | H              | F              | H              | F              | H               | NO <sub>2</sub>    | OMe                | H              | NI                    |
| <b>83x</b>              | F              | H              | Cl             | H              | H               | NH <sub>2</sub>    | OMe                | H              | NI                    |
| <b>83y</b>              | H              | OMe            | H              | H              | H               | OBn                | H                  | H              | NI                    |
| <b>83z</b>              | Cl             | H              | H              | H              | OMe             | H                  | H                  | Cl             | NI                    |
| kojic acid ( <b>5</b> ) |                |                |                |                |                 |                    |                    |                | 17.76                 |

**Table S50.** Quinazolines, see **Figure 54** (Chlorophenylquinazolin-4(3*H*)-one derivatives **84** with inhibitory potential of TYR).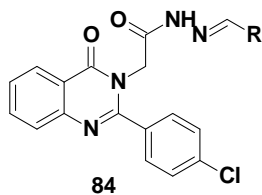

| Compound   | R                           | PI (%) | IC <sub>50</sub> (μM) |
|------------|-----------------------------|--------|-----------------------|
| <b>84a</b> | Ph-O-Ph                     | 63.68  | 25.48                 |
| <b>84b</b> | 4-Me-Ph                     | 53.84  | -                     |
| <b>84c</b> | 2-NO <sub>2</sub> ,3-OMe-Ph | 49.77  | -                     |



|                |                        |       |      |
|----------------|------------------------|-------|------|
| <b>84d</b>     | 3-OMe-Ph               | 41.78 | -    |
| <b>84e</b>     | 2-F-Ph                 | 38.58 | -    |
| <b>84f</b>     | 3-NO <sub>2</sub> -Ph  | 29.28 | -    |
| <b>84g</b>     | 4-OMe-Ph               | 29.22 | -    |
| <b>84h</b>     | 2-Me-Ph                | 25.64 | -    |
| <b>84i</b>     | 2-naphtyl              | 24.61 | -    |
| <b>84j</b>     | 4-NO <sub>2</sub> -Ph  | 22.60 | -    |
| <b>84k</b>     | 2-Cl-Ph                | 22.37 | -    |
| <b>84l</b>     | 2-thienyl              | 17.17 | -    |
| <b>84m</b>     | Ph                     | 7.30  | -    |
| <b>84n</b>     | 2-Cl,5-NO <sub>2</sub> | 1.02  | -    |
| kojic acid (5) |                        |       | 9.30 |

**Table S51.** Quinazolines, see **Figure 55** (Quinazoline derivatives **85** and **86** in three-digit micromolar range of TYR inhibition).

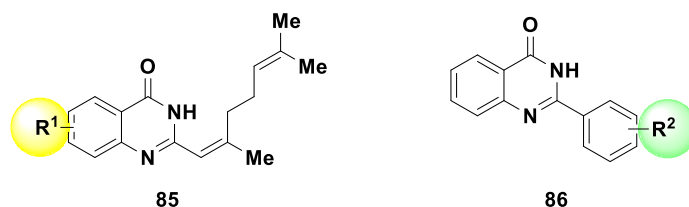

| Compound    | R <sup>1</sup> | R <sup>2</sup> | IC <sub>50</sub> (μM) |
|-------------|----------------|----------------|-----------------------|
| <b>85a</b>  | H              | -              | 103                   |
| <b>85b</b>  | 5-F            | -              | 105                   |
| <b>85c</b>  | 6-Cl           | -              | 168                   |
| <b>85d</b>  | 7-Me           | -              | 253                   |
| <b>86a</b>  | -              | H              | -                     |
| <b>86b</b>  | -              | 4-Me           | -                     |
| <b>86c</b>  | -              | 4-OMe          | -                     |
| arbutin (6) |                |                | 180                   |

**Table S52.** Miscellaneous, see **Figure 56** (Cinnamide derivatives and their percentage of inhibition of monophenolase).

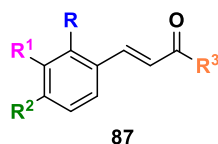

| Compound   | R  | R <sup>1</sup> | R <sup>2</sup> | R <sup>3</sup>      | PI (%) |
|------------|----|----------------|----------------|---------------------|--------|
| <b>87a</b> | OH | H              | OH             | pyrrolidine         | 93.72  |
| <b>87b</b> | OH | H              | OH             | piperidine          | 78.97  |
| <b>87c</b> | OH | H              | OH             | 1-methyl-piperazine | 94.39  |
| <b>87d</b> | OH | H              | OH             | morpholine          | 95.74  |
| <b>87e</b> | H  | OMe            | OH             | piperidine          | 59.09  |
| <b>87f</b> | H  | OH             | OMe            | 1-methyl-piperazine | 40.22  |
| <b>87f</b> | H  | OH             | OMe            | piperidine          | 36.70  |
| <b>87g</b> | H  | OH             | OMe            | morpholine          | 31.12  |
| <b>87h</b> | H  | OH             | OMe            | pyrrolidine         | 26.42  |

|                         |   |     |    |                     |       |
|-------------------------|---|-----|----|---------------------|-------|
| <b>87i</b>              | H | OMe | OH | pyrrolidine         | 24.00 |
| <b>87i</b>              | H | OMe | OH | morpholine          | 21.28 |
| <b>87j</b>              | H | OMe | OH | 1-methyl-piperazine | 19.33 |
| <b>87k</b>              | H | H   | OH | piperidine          | 19.07 |
| <b>87l</b>              | H | H   | OH | pyrrolidine         | 13.65 |
| <b>87m</b>              | H | OH  | OH | piperidine          | 12.43 |
| <b>87n</b>              | H | OH  | OH | pyrrolidine         | 3.41  |
| <b>87o</b>              | H | H   | OH | 1-methyl-piperazine | -     |
| <b>87p</b>              | H | OH  | OH | 1-methyl-piperazine | -     |
| <b>87q</b>              | H | H   | OH | morpholine          | -     |
| <b>87r</b>              | H | OH  | OH | morpholine          | -     |
| kojic acid ( <b>5</b> ) |   |     |    |                     | 20.57 |

**Table S53.** Miscellaneous, see **Figure 57** (Morpholine containing cinnamides and inhibition of TYR thereof).

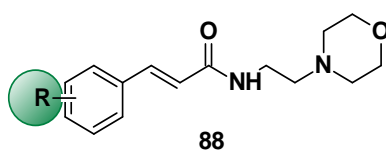

| Compound                | R                 | IC <sub>50</sub> (μM) |
|-------------------------|-------------------|-----------------------|
| <b>88a</b>              | 3-Cl              | 15.2                  |
| <b>88b</b>              | 3-Me              | 21.3                  |
| <b>88c</b>              | 4-NO <sub>2</sub> | 25.2                  |
| <b>88d</b>              | 4-Cl              | 28.6                  |
| <b>88e</b>              | 3-NO <sub>2</sub> | 35.5                  |
| <b>88f</b>              | 2-NO <sub>2</sub> | 36.0                  |
| <b>88g</b>              | 4-F               | 40.6                  |
| <b>88h</b>              | 3,4,5-OMe         | 50.0                  |
| <b>88i</b>              | H                 | 75.8                  |
| <b>88j</b>              | 2F                | >100                  |
| <b>88k</b>              | 3-F               | >100                  |
| <b>88l</b>              | 2-Cl              | >100                  |
| <b>88m</b>              | 2-OMe             | >100                  |
| <b>88n</b>              | 3-OMe             | >100                  |
| <b>88o</b>              | 4-OMe             | >100                  |
| <b>88p</b>              | 3,4-diOMe         | >100                  |
| <b>88q</b>              | 2-Me              | >100                  |
| <b>88r</b>              | 4-Me              | >100                  |
| <b>88s</b>              | 4-OH,3-OMe        | >100                  |
| kojic acid ( <b>5</b> ) |                   | 14.4                  |

**Table S54.** Chromone derivatives, see **Figure 59** (Chromone derivatives and their inhibition of TYR).

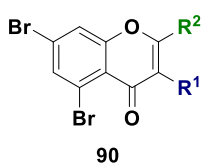

| Compound   | R <sup>1</sup> | R <sup>2</sup> | IC <sub>50</sub> (μM) |
|------------|----------------|----------------|-----------------------|
| <b>90a</b> | OH             | 3,4-diOMe-Ph   | 0.093                 |

|                |    |                          |       |
|----------------|----|--------------------------|-------|
| 90b            | OH | 3-NO <sub>2</sub> -Ph    | 0.15  |
| 90c            | H  | indole                   | 0.22  |
| 90d            | OH | 4-Me-Ph                  | 0.126 |
| 90e            | OH | 4-NO <sub>2</sub> -Ph    | 0.27  |
| 90f            | H  | 4-NO <sub>2</sub> -Ph    | 0.27  |
| 90g            | H  | 3,4-diOMe-Ph             | 0.49  |
| 90h            | OH | 4-N(Me) <sub>2</sub> -Ph | 0.50  |
| 90i            | OH | 1-naphtyl                | 0.564 |
| 90j            | H  | 4-N(Me) <sub>2</sub> -Ph | 0.57  |
| 90k            | H  | 2-thienyl                | 0.68  |
| 90l            | OH | 4-Cl-Ph                  | 0.71  |
| 90m            | H  | 2-furyl                  | 2.07  |
| 90n            | OH | 4-F-Ph                   | 2.36  |
| 90o            | OH | 2-furyl                  | 2.5   |
| 90p            | OH | 2-thienyl                | 3.01  |
| 90q            | H  | 3-NO <sub>2</sub> -Ph    | 3.28  |
| 90r            | H  | 1-naphtyl                | 3.41  |
| 90s            | H  | 4-Cl-Ph                  | 4.2   |
| 90t            | OH | 4-CO <sub>2</sub> H-Ph   | 4.26  |
| 90u            | H  | 4-Me-Ph                  | 7.2   |
| 90v            | 7  | 2,4-diMe-Ph              | 7.57  |
| 90w            | H  | 4-CO <sub>2</sub> H-Ph   | 9.7   |
| 90x            | H  | 2,4-diOMe-Ph             | 11.33 |
| 90y            | H  | 4-F-Ph                   | 20.5  |
| 90z            | OH | indole                   | 23.58 |
| kojic acid (5) |    |                          | 1.79  |

**Table S55.** Chromone derivatives, see **Figure 60** (3-Hydroxyflavone derivatives **91** as TYRIs).

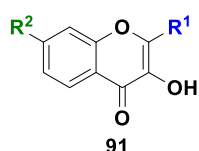

| Compound | R <sup>1</sup>        | R <sup>2</sup> | IC <sub>50</sub> (μM) |
|----------|-----------------------|----------------|-----------------------|
| 91a      | 4-Cl-Ph               | OH             | 0.23                  |
| 91b      | 4-NO <sub>2</sub> -Ph | OH             | 0.28                  |
| 91c      | 2-thienyl             | OH             | 0.35                  |
| 91d      | 4-NO <sub>2</sub> -Ph | H              | 0.284                 |
| 91e      | N(Ph) <sub>3</sub>    | H              | 0.327                 |
| 91f      | 2-thienyl             | H              | 0.347                 |
| 91g      | 4-F-Ph                | H              | 0.799                 |
| 91h      | 4-OMe-Ph              | H              | 1.787                 |
| 91i      | 4-OMe-Ph              | Br             | 2.236                 |
| 91j      | 3-NO <sub>2</sub> -Ph | H              | 2.564                 |
| 91k      | 1-naphtyl             | H              | 2.90                  |
| 91l      | Ph                    | H              | 4.268                 |
| 91m      | 4-Br-Ph               | H              | 4.437                 |
| 91n      | 4- <i>i</i> Bu-Ph     | H              | 4.844                 |
| 91o      | 3-Br-Ph               | Cl             | 5.783                 |
| 91p      | 4-Br-ph               | Br             | 7.226                 |

|                         |                        |    |        |
|-------------------------|------------------------|----|--------|
| <b>91q</b>              | 4-Me                   | H  | 14.171 |
| <b>91r</b>              | 4- <i>i</i> Bu-Ph      | Br | 19.595 |
| <b>91s</b>              | 4-CO <sub>2</sub> H-Ph | H  | 35.189 |
| kojic acid ( <b>5</b> ) |                        |    | 1.79   |

**Table S56.** Chromone derivatives, see **Figure 61** (Thioflavones and thioflavonols derivatives and their activities on TYR inhibition).

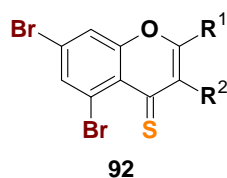

| Compound                | R <sup>1</sup>           | R <sup>2</sup> | IC <sub>50</sub> (μM) |
|-------------------------|--------------------------|----------------|-----------------------|
| <b>92a</b>              | 3-NO <sub>2</sub> -Ph    | OH             | 1.12                  |
| <b>92b</b>              | 4-Cl-Ph                  | OH             | 1.16                  |
| <b>92c</b>              | 4-N(Me) <sub>2</sub> -Ph | OH             | 1.37                  |
| <b>92d</b>              | 4-NO <sub>2</sub> -Ph    | OH             | 1.45                  |
| <b>92e</b>              | 3,4-diOMe-Ph             | OH             | 1.49                  |
| <b>92f</b>              | 2-naphtyl                | OH             | 1.55                  |
| <b>92g</b>              | 2,4-diMe-Ph              | OH             | 1.70                  |
| <b>92h</b>              | 4-Cl-Ph                  | H              | 3.46                  |
| <b>92i</b>              | 2-naphtyl                | H              | 3.90                  |
| <b>92j</b>              | 2,4-diMe-Ph              | H              | 3.96                  |
| <b>92k</b>              | 4-Me-Ph                  | OH             | 4.60                  |
| <b>92l</b>              | 3-NO <sub>2</sub> -Ph    | H              | 4.94                  |
| <b>92m</b>              | 2-thienyl                | H              | 5.06                  |
| <b>92n</b>              | 3,4-diOMe-Ph             | H              | 5.68                  |
| kojic acid ( <b>5</b> ) |                          |                | 12.6                  |

**Table S57.** Xanthone derivatives, see **Figure 62** (1-hydroxyl xanthone (**93**), and derived 3-aryl substituted xanthone derivatives and their TYR inhibitory potencies).

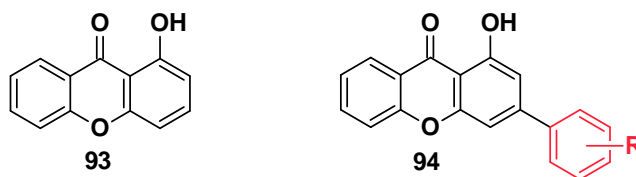

| Compound   | R                     | IC <sub>50</sub> (μM) |
|------------|-----------------------|-----------------------|
| <b>93</b>  | -                     | >150                  |
| <b>94a</b> | 4-OH                  | 11.3                  |
| <b>94b</b> | 2-OH                  | 14.1                  |
| <b>94c</b> | 3-OH                  | 16.2                  |
| <b>94d</b> | 3,4-diOMe             | 34.8                  |
| <b>94e</b> | 3,4,5- <i>tri</i> OMe | 35.2                  |
| <b>94f</b> | 4-OMe                 | 36.5                  |
| <b>94g</b> | 2,4-diOMe             | 37.4                  |
| <b>94h</b> | 3,5-diOMe             | 39.8                  |
| <b>94i</b> | 4-CHO                 | 42.1                  |

|                         |                      |       |
|-------------------------|----------------------|-------|
| <b>94j</b>              | 4-CO <sub>2</sub> H  | 44.2  |
| <b>94k</b>              | 4-COMe               | 45.1  |
| <b>94l</b>              | 2-CHO                | 45.6  |
| <b>94m</b>              | 3,4-diOH             | 50.7  |
| <b>94n</b>              | 3,4,5- <i>tri</i> OH | 52.6  |
| <b>94o</b>              | 2,4-diOH             | 53.6  |
| <b>94p</b>              | 3-CHO                | 54.1  |
| <b>94q</b>              | 2-CO <sub>2</sub> H  | 55.1  |
| <b>94r</b>              | 4-COOMe              | 56.1  |
| <b>94s</b>              | 2-CO <sub>2</sub> H  | 73.9  |
| <b>94t</b>              | 2-COOMe              | 78.1  |
| <b>94u</b>              | 2-OMe                | 82.2  |
| <b>94v</b>              | 3,5-diOH             | 92.6  |
| <b>94w</b>              | 3-OMe                | 109.1 |
| <b>94x</b>              | 3-COOMe              | 115.8 |
| kojic acid ( <b>5</b> ) |                      | 17.3  |

**Table S58.** Xanthone derivatives, see **Figure 64** (Further xanthone derivatives with promising inhibitory activity of TYR).

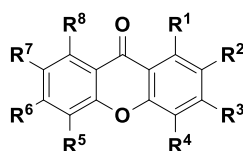

**98**

| Compound   | R <sup>1</sup>     | R <sup>2</sup> | R <sup>3</sup> | R <sup>4</sup> | R <sup>5</sup> | R <sup>6</sup> | R <sup>7</sup> | R <sup>8</sup> | IC <sub>50</sub> (μM) |
|------------|--------------------|----------------|----------------|----------------|----------------|----------------|----------------|----------------|-----------------------|
| <b>98a</b> | Me                 | Cl             | OMe            | OMe            | H              | OMe            | H              | H              | 1.9                   |
| <b>98b</b> | Me                 | H              | OMe            | OMe            | H              | H              | H              | H              | 2.0                   |
| <b>98c</b> | Me                 | H              | OMe            | OMe            | H              | OMe            | H              | H              | 2.24                  |
| <b>98d</b> | OH                 | OMe            | OH             | H              | H              | H              | H              | H              | 3.01                  |
| <b>98e</b> | CHO                | H              | OMe            | OMe            | H              | OMe            | H              | H              | 3.16                  |
| <b>98f</b> | Me                 | H              | OH             | OH             | H              | OH             | H              | H              | 3.28                  |
| <b>98g</b> | CH <sub>2</sub> Br | H              | OMe            | OMe            | H              | H              | H              | H              | 3.37                  |
| <b>98h</b> | H                  | H              | OH             | OMe            | H              | H              | H              | H              | 3.81                  |
| <b>98i</b> | OMe                | OMe            | H              | H              | H              | H              | H              | H              | 4.02                  |
| <b>98j</b> | H                  | H              | OH             | H              | H              | OH             | H              | H              | 4.42                  |
| <b>98k</b> | OH                 | H              | H              | H              | H              | H              | OH             | H              | 4.52                  |
| <b>98l</b> | H                  | H              | OMe            | OMe            | H              | H              | H              | H              | 5.12                  |
| <b>98m</b> | H                  | H              | OH             | OH             | H              | H              | H              | H              | 5.12                  |
| <b>98n</b> | H                  | H              | OMe            | H              | H              | H              | H              | H              | 5.14                  |
| <b>98o</b> | OMe                | H              | H              | H              | H              | H              | H              | H              | 5.14                  |
| <b>98p</b> | H                  | H              | OMe            | OH             | H              | H              | H              | H              | 5.2                   |
| <b>98q</b> | H                  | H              | H              | OMe            | H              | H              | H              | H              | 5.33                  |
| <b>98r</b> | Me                 | Br             | OMe            | OMe            | H              | H              | H              | H              | 5.57                  |
| <b>98s</b> | H                  | OH             | H              | H              | H              | H              | H              | H              | 5.60                  |
| <b>98t</b> | H                  | OH             | OH             | H              | H              | H              | H              | H              | 5.70                  |
| <b>98u</b> | OH                 | OH             | H              | H              | H              | H              | H              | H              | 7.8                   |
| <b>98v</b> | H                  | OMe            | OMe            | H              | H              | H              | H              | H              | 8.29                  |
| <b>98w</b> | H                  | H              | H              | OH             | H              | H              | H              | H              | 8.46                  |

|                         |     |     |     |     |   |   |   |   |       |
|-------------------------|-----|-----|-----|-----|---|---|---|---|-------|
| <b>98x</b>              | H   | OMe | H   | H   | H | H | H | H | 8.47  |
| <b>98y</b>              | OH  | H   | H   | H   | H | H | H | H | 8.83  |
| <b>98z</b>              | H   | H   | H   | H   | H | H | H | H | 8.84  |
| <b>98aa</b>             | Me  | H   | OH  | OH  | H | H | H | H | 8.93  |
| <b>98bb</b>             | H   | H   | OH  | H   | H | H | H | H | 9.26  |
| <b>98cc</b>             | CHO | H   | OMe | OMe | H | H | H | H | 29.13 |
| <b>98dd</b>             | CHO | H   | OH  | OH  | H | H | H | H | 89.37 |
| kojic acid ( <b>5</b> ) |     |     |     |     |   |   |   |   | 12.81 |

**Table S59.** Coumarin derivatives, see **Figure 65** (Coumarin derivatives **99** and **100** as TYRIs).

**Hydroxycoumarin derivatives**

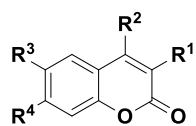

**99**

**Geranyloxycoumarin derivatives**

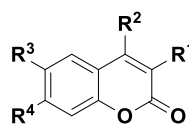

**100**

| Compound             | R <sup>1</sup>  | R <sup>2</sup>                    | R <sup>3</sup> | R <sup>4</sup> | PI (%) | IC <sub>50</sub> (μM) |
|----------------------|-----------------|-----------------------------------|----------------|----------------|--------|-----------------------|
| <b>99a</b>           | H               | H                                 | OH             | H              | 191    | -                     |
| <b>99b</b>           | CN              | H                                 | H              | OH             | 158    | -                     |
| <b>99c</b>           | H               | Me                                | OH             | H              | 102    | -                     |
| <b>99d</b>           | H               | Me                                | Cl             | OH             | 101    | -                     |
| <b>99e</b>           | OH              | H                                 | H              | H              | 81     | -                     |
| <b>99f</b>           | Cl              | Me                                | H              | OH             | 79     | -                     |
| <b>99g</b>           | NO <sub>2</sub> | OH                                | H              | H              | 68     | -                     |
| <b>99h</b>           | H               | Me                                | OH             | OH             | 35     | -                     |
| <b>99i</b>           | H               | H                                 | H              | OH             | 15     | -                     |
| <b>99j</b>           | H               | CH <sub>2</sub> CO <sub>2</sub> H | H              | OH             | 14     | -                     |
| <b>100a</b>          | H               | Me                                | geranyloxy     | geranyloxy     | 200    | 0.67                  |
| <b>100b</b>          | H               | Me                                | Cl             | geranyloxy     | 137    | -                     |
| <b>100c</b>          | H               | H                                 | H              | geranyloxy     | 132    | -                     |
| <b>100d</b>          | H               | CF <sub>3</sub>                   | H              | geranyloxy     | 127    | -                     |
| <b>100e</b>          | H               | Me                                | H              | geranyloxy     | 121    | -                     |
| <b>100f</b>          | geranyloxy      | H                                 | H              | H              | 107    | -                     |
| <b>100g</b>          | H               | Me                                | H              | geranyloxy     | 97     | -                     |
| <b>100h</b>          | Ph              | H                                 | H              | geranyloxy     | 79     | -                     |
| arbutin ( <b>6</b> ) |                 |                                   |                |                | 100    | -                     |

**Table S60.** Coumarin derivatives, see **Figure 66a** (Coumarin derivatives with either aryl groups, **101** and **102**).

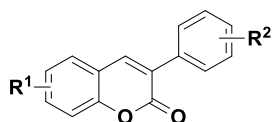

**101**

or

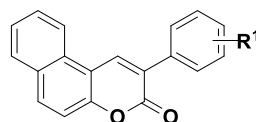

**102**

| Compound    | R <sub>1</sub> | R <sub>2</sub> | IC <sub>50</sub> (μM) |
|-------------|----------------|----------------|-----------------------|
| <b>101a</b> | 2,4-diOH       | 4-Br           | 1.05                  |
| <b>101b</b> | 5,7-diOH       | 3-Br           | 7.0                   |
| <b>101c</b> | 6,7-diOH       | 3-Br           | 8.3                   |

|                         |          |      |      |
|-------------------------|----------|------|------|
| <b>101d</b>             | 6,7-diOH | 4-Br | 39.9 |
| <b>101e</b>             | 7-OH     | 3-Br | 42.0 |
| <b>101f</b>             | 5,7-diOH | 2-Br | >50  |
| <b>101g</b>             | 6,7-diOH | 2-Br | >50  |
| <b>101h</b>             | 7,8-diOH | 4-Br | >50  |
| <b>101i</b>             | 7,8-diOH | 3-Br | >50  |
| <b>101j</b>             | 7,8-diOH | 2-Br | >50  |
| <b>101k</b>             | 6,7-diOH | 3-OH | >50  |
| <b>101l</b>             | 6,7-diOH | 2-OH | >50  |
| <b>102a</b>             | 4-OH     | -    | >50  |
| <b>102b</b>             | 3-OH     | -    | >50  |
| <b>102c</b>             | 2-OH     | -    | >50  |
| <b>102d</b>             | 3,4-diOH | -    | >50  |
| <b>102e</b>             | 3,5-diOH | -    | >50  |
| kojic acid ( <b>5</b> ) |          |      | 17.9 |

**Table S61.** Coumarin derivatives, see **Figure 66b** (Coumarin derivatives with thiosemicarbazone (**103**, b) group in the 3-position).

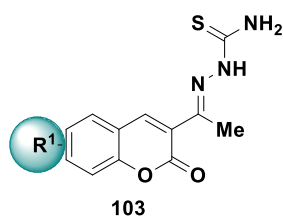

| Compound                | R <sup>1</sup> | IC <sub>50</sub> (μM) |
|-------------------------|----------------|-----------------------|
| <b>103a</b>             | H              | 4.0                   |
| <b>103b</b>             | 7,8-diOH       | 4.1                   |
| <b>103c</b>             | 7-OH           | 5.0                   |
| <b>103d</b>             | 8-OH           | 5.7                   |
| <b>103e</b>             | 6,7-diOH       | 6                     |
| <b>103f</b>             | 6-OH           | 14                    |
| kojic acid ( <b>5</b> ) |                | 18.1                  |

**Table S62.** Coumarin derivatives, see **Figure 67** (Coumarin-based thiophenyl-pyrazolylthiazole hybrids which show good activity in TYR inhibition.).

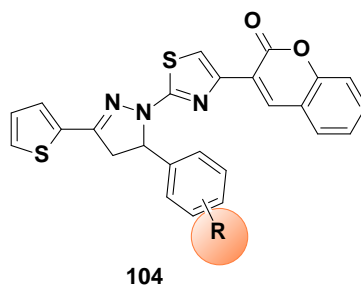

| Compound    | R           | IC <sub>50</sub> (μM) |
|-------------|-------------|-----------------------|
| <b>104a</b> | 3-OMe,4-OBn | 0.043                 |
| <b>104b</b> | 4-OMe       | 0.278                 |
| <b>104c</b> | 4-Br        | 0.809                 |

|                         |       |        |
|-------------------------|-------|--------|
| <b>104d</b>             | H     | 1.206  |
| <b>104e</b>             | 4-F   | 1.946  |
| <b>104f</b>             | 4-Cl  | 2.028  |
| <b>104g</b>             | 4-Me  | 4.071  |
| <b>104h</b>             | 4-OPh | 4.508  |
| kojic acid ( <b>5</b> ) |       | 18.521 |

**Table S63.** Kojic acid derivatives, see **Figure 68** (Triazole-based kojic acid derivatives **107** and their inhibitory profile on TYR.).

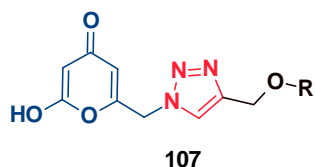

| Compound                | R                        | IC <sub>50</sub> (μM) |
|-------------------------|--------------------------|-----------------------|
| <b>107a</b>             | 1-naphtyl                | 0.06                  |
| <b>107b</b>             | 4-hydroxycoumarin        | 0.02                  |
| <b>107c</b>             | 2-naphtyl                | 0.30                  |
| <b>107d</b>             | 4-NO <sub>2</sub> -Ph    | 0.52                  |
| <b>107e</b>             | 4-Cl-Ph                  | 0.69                  |
| <b>107f</b>             | 3,5-diMe-Ph              | 0.74                  |
| <b>107g</b>             | 3,4,5- <i>tri</i> OMe-Ph | 0.87                  |
| <b>107h</b>             | 4-F-Ph                   | 0.88                  |
| <b>107i</b>             | 3-Cl-Ph                  | 0.99                  |
| <b>107j</b>             | 3-F-Ph                   | 1.07                  |
| <b>107k</b>             | 2,4-diCl                 | 1.12                  |
| <b>107l</b>             | 4-OMe-Ph                 | 1.24                  |
| <b>107m</b>             | 4-CH <sub>2</sub> OH-Ph  | 1.32                  |
| <b>107n</b>             | Ph                       | 1.33                  |
| <b>107o</b>             | 4-CH <sub>3</sub> CONHPh | 2.64                  |
| <b>107p</b>             | 4-CN-Ph                  | 6.29                  |
| kojic acid ( <b>5</b> ) |                          | 9.28                  |

**Table S64.** Kojic acid derivatives, see **Figure 69** (Kojic acid derivatives containing a benzylpiperazine portion (**108**) and their TYR inhibition).

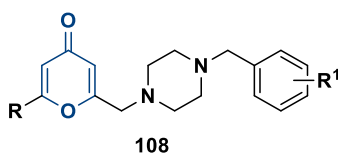

| Compound    | R                  | R <sup>1</sup> | IC <sub>50</sub> (μM) |
|-------------|--------------------|----------------|-----------------------|
| <b>108a</b> | hydroxymethyl      | 3,4-diCl       | 86.2                  |
| <b>108b</b> | pirrolidinylmethyl | 3,4-diCl       | 94.1                  |
| <b>108c</b> | methyl             | 3,4-diCl       | 123.7                 |
| <b>108d</b> | methyl             | 3-Cl           | 198.7                 |
| <b>108e</b> | piperidinylmethyl  | 3,4-diCl       | 204.1                 |
| <b>108f</b> | hydroxymethyl      | 3-Cl           | 223.2                 |
| <b>108g</b> | pirrolidinylmethyl | 4-F            | 225.5                 |



|                         |                    |          |       |
|-------------------------|--------------------|----------|-------|
| <b>108h</b>             | piperidinylmethyl  | 4-F      | 232.3 |
| <b>108i</b>             | hydroxymethyl      | 4-F      | 264.2 |
| <b>108j</b>             | methyl             | 4-F      | 362.1 |
| <b>108k</b>             | methyl             | 4-Cl     | 438.8 |
| <b>108l</b>             | piperidinylmethyl  | 3-Cl     | 493.8 |
| <b>108m</b>             | pirrolidinylmethyl | 3-Cl     | 588.2 |
| <b>108n</b>             | chloromethyl       | 4-F      | 618.6 |
| <b>108o</b>             | hydroxymethyl      | 4-Cl     | 710.0 |
| <b>108p</b>             | piperidinylmethyl  | 4-Cl     | 746.0 |
| <b>108q</b>             | chloromethyl       | 3-Cl     | 990.7 |
| <b>108r</b>             | morpholinylmethyl  | 3-Cl     | 1105  |
| <b>108s</b>             | hydroxymethyl      | 2,5-diF  | 1564  |
| <b>108t</b>             | pirrolidinylmethyl | 2,5-diF  | 1616  |
| <b>108u</b>             | morpholinylmethyl  | 4-Cl     | 1759  |
| <b>108v</b>             | morpholinylmethyl  | 4-F      | 1847  |
| <b>108w</b>             | morpholinylmethyl  | 2,5-diF  | 1900  |
| <b>108x</b>             | chloromethyl       | 4-Cl     | 1900  |
| <b>108y</b>             | chloromethyl       | 2,5-dF   | >2000 |
| <b>108z</b>             | morpholinylmethyl  | 3,4-diCl | >2000 |
| <b>108aa</b>            | piperidinylmethyl  | 2,5-dF   | >2000 |
| kojic acid ( <b>5</b> ) |                    |          | 418.2 |

**Table S65.** Kojic acid derivatives, see **Figure 70** (Thioquinazolinones conjugated to kojic acid derivatives (**109**) showing medium 3-digit nanomolar activity as TYRIs).

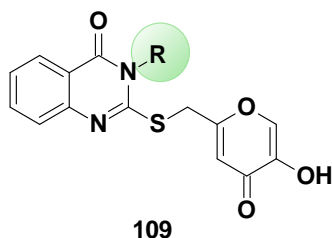

| Compound                | R                  | IC <sub>50</sub> (μM) |
|-------------------------|--------------------|-----------------------|
| <b>109a</b>             | pyridin-2-ylmethyl | 0.46                  |
| <b>109b</b>             | pyridin-2-yl       | 0.50                  |
| <b>109c</b>             | 4-Cl-Ph            | 0.50                  |
| <b>109d</b>             | Bn                 | 1.42                  |
| <b>109e</b>             | <i>i</i> -Pr       | 1.44                  |
| <b>109f</b>             | 4-Br-Ph            | 1.48                  |
| <b>109g</b>             | 4-F-Bn             | 1.56                  |
| <b>109h</b>             | allyl              | 1.56                  |
| <b>109i</b>             | Ph                 | 1.88                  |
| <b>109j</b>             | cyclopropyl        | 2.10                  |
| <b>109k</b>             | 3,4-diOMe-Ph       | 2.12                  |
| <b>109l</b>             | pyridin-4-ylmethyl | 2.20                  |
| <b>109m</b>             | <i>n</i> -butyl    | 2.31                  |
| <b>109n</b>             | 4-OMe-Ph           | 2.40                  |
| <b>109o</b>             | 4-Me-Ph            | 5.32                  |
| kojic acid ( <b>5</b> ) |                    | 9.30                  |

**Table S66.** Kojic acid derivatives, see **Figure 71a** (Kojic acid derivatives).

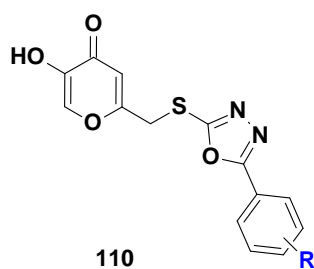

| Compound                | R                 | IC <sub>50</sub> (μM) |
|-------------------------|-------------------|-----------------------|
| <b>110a</b>             | 4-F               | 5.32                  |
| <b>110b</b>             | 4-Me              | 6.17                  |
| <b>110c</b>             | 4-OMe             | 9.57                  |
| <b>110d</b>             | Ph                | 10.24                 |
| <b>110e</b>             | 3-Cl              | 10.24                 |
| <b>110f</b>             | 3,4-diOH          | 10.67                 |
| <b>110g</b>             | 4- <i>t</i> Bu    | 11.34                 |
| <b>110h</b>             | 4-Br              | 11.47                 |
| <b>110i</b>             | 4-Cl              | 11.88                 |
| <b>110j</b>             | 4-OH              | 14.43                 |
| <b>110k</b>             | 2-OH              | 14.79                 |
| <b>110l</b>             | 3-Me              | 17.36                 |
| <b>110m</b>             | 3-OH              | 19.30                 |
| <b>110n</b>             | 2-NO <sub>2</sub> | 19.45                 |
| kojic acid ( <b>5</b> ) |                   | 49.77                 |

**Table S67.** Kojic acid derivatives, see **Figure 71b** (Kojic acid derivatives).

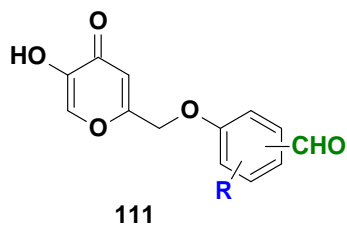

| Compound                | R                                 | CHO          | IC <sub>50</sub> (μM) |
|-------------------------|-----------------------------------|--------------|-----------------------|
| <b>111a</b>             | 3-F                               | <i>para</i>  | 5.32                  |
| <b>111b</b>             | H                                 | <i>para</i>  | 5.98                  |
| <b>111c</b>             | 2-F                               | <i>para</i>  | 9.78                  |
| <b>111d</b>             | 3,5-diMe                          | <i>para</i>  | 12.39                 |
| <b>111e</b>             | 2-Cl                              | <i>para</i>  | 12.75                 |
| <b>111f</b>             | 5-OMe                             | <i>meta</i>  | 25.31                 |
| <b>111g</b>             | 2-OMe                             | <i>para</i>  | 26.44                 |
| <b>111h</b>             | 2-C <sub>2</sub> H <sub>5</sub> O | <i>para</i>  | 37.34                 |
| <b>111i</b>             | 2,6-diMe                          | <i>para</i>  | 77.18                 |
| <b>111j</b>             | 2-OMe,6-Br                        | <i>para</i>  | 77.89                 |
| <b>111k</b>             | 2,6-diOMe                         | <i>para</i>  | >100                  |
| <b>111l</b>             | 6-OMe                             | <i>ortho</i> | >100                  |
| <b>111m</b>             | 6-C <sub>2</sub> H <sub>5</sub> O | <i>ortho</i> | >100                  |
| kojic acid ( <b>5</b> ) |                                   |              | 48.05                 |

**Table S68.** Human tyrosinase inhibitors, see **Figure 73** (PROTACs as human tyrosinase degraders).

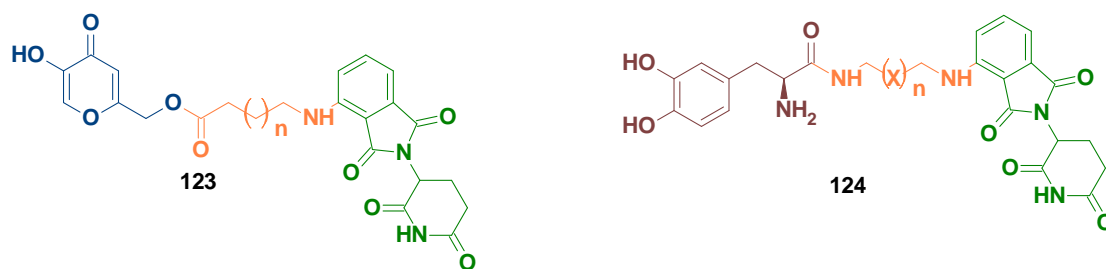

| Compound    | <i>n</i> | X                                  | Reduction (%) | IC <sub>50</sub> (μM) |
|-------------|----------|------------------------------------|---------------|-----------------------|
| <b>123a</b> | 3        | -                                  | -             | -                     |
| <b>123b</b> | 5        | -                                  | -             | -                     |
| <b>123c</b> | 6        | -                                  | -             | -                     |
| <b>123d</b> | 8        | -                                  | -             | -                     |
| <b>124a</b> | 3        | CH <sub>2</sub>                    | 46            | 112.7                 |
| <b>124b</b> | 6        | CH <sub>2</sub>                    | 38            | -                     |
| <b>124c</b> | 5        | CH <sub>2</sub>                    | 37            | -                     |
| <b>124d</b> | 8        | CH <sub>2</sub>                    | 37            | -                     |
| <b>124e</b> | 4        | CH <sub>2</sub>                    | 33            | -                     |
| <b>124f</b> | 1        | CH <sub>2</sub>                    | 25            | -                     |
| <b>124g</b> | 2        | CH <sub>2</sub>                    | 19            | -                     |
| <b>124h</b> | 0        | CH <sub>2</sub>                    | 14            | -                     |
| <b>124i</b> | 1        | CH <sub>2</sub> -O-CH <sub>2</sub> | 7             | -                     |
| <b>124j</b> | 2        | CH <sub>2</sub> -O-CH <sub>2</sub> | 7             | -                     |

**Table S69.** Human tyrosinase inhibitors, see **Figure 75** (Resorcinol-based hemiindigoid derivatives).

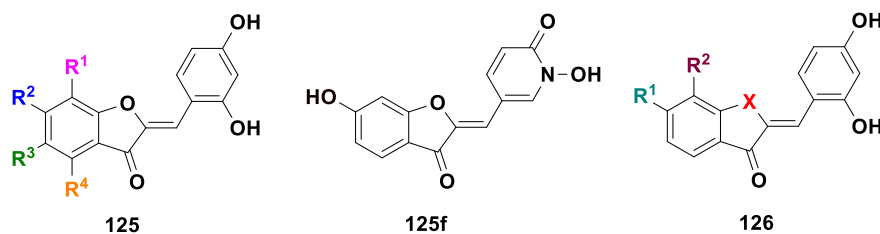

| Compound    | R <sup>1</sup> | R <sup>2</sup>     | R <sup>3</sup> | R <sup>4</sup> | X | MNT-1 lysate IC <sub>50</sub> (μM) | MNT-1 whole cells IC <sub>50</sub> (μM) | MNT-1 whole cells CC <sub>50</sub> (μM) |
|-------------|----------------|--------------------|----------------|----------------|---|------------------------------------|-----------------------------------------|-----------------------------------------|
| <b>125a</b> | H              | H                  | H              | OH             | - | 1.57                               | 32                                      | 108                                     |
| <b>125b</b> | H              | OH                 | H              | H              | - | 6.4                                | -                                       | -                                       |
| <b>125c</b> | H              | OMe                | H              | H              | - | 6.9                                | -                                       | -                                       |
| <b>125d</b> | H              | OH                 | H              | OH             | - | 7.7                                | -                                       | -                                       |
| <b>125e</b> | OH             | OH                 | H              | H              | - | 11.8                               | -                                       | -                                       |
| <b>125f</b> | -              | -                  | -              | -              | - | 15.0                               | -                                       | -                                       |
| <b>125g</b> | H              | H                  | H              | H              | - | 18.0                               | -                                       | -                                       |
| <b>125h</b> | H              | N(Me) <sub>2</sub> | H              | OH             | - | 18.4                               | -                                       | -                                       |
| <b>125i</b> | H              | H                  | OH             | H              | - | 19.0                               | -                                       | -                                       |
| <b>125j</b> | H              | H                  | H              | OH             | - | 25.0                               | -                                       | -                                       |
| <b>125k</b> | I              | OH                 | H              | H              | - | 32.0                               | -                                       | -                                       |
| <b>125l</b> | Me             | OH                 | H              | H              | - | 80.0                               | -                                       | -                                       |

|                      |     |                    |   |     |                 |      |    |    |
|----------------------|-----|--------------------|---|-----|-----------------|------|----|----|
| <b>125m</b>          | OMe | H                  | H | H   | -               | 80.0 | -  | -  |
| <b>125n</b>          | H   | F                  | H | F   | -               | 88.0 | -  | -  |
| <b>125o</b>          | H   | OBu                | H | H   | -               | >100 | -  | -  |
| <b>125p</b>          | H   | Cl                 | H | H   | -               | >100 | -  | -  |
| <b>125q</b>          | H   | N(Me) <sub>2</sub> | H | H   | -               | >100 | -  | -  |
| <b>125r</b>          | H   | OMe                | H | OMe | -               | >100 | -  | -  |
| <b>125s</b>          | Me  | OMe                | - | -   | -               | >100 | -  | -  |
| <b>125t</b>          | OMe | OMe                | - | -   | -               | >100 | -  | -  |
| <b>126a</b>          | H   | OH                 | - | -   | CH <sub>2</sub> | 1.6  | 29 | 91 |
| <b>126b</b>          | OH  | H                  | - | -   | NH              | 2.3  | -  | -  |
| <b>126c</b>          | OH  | H                  | - | -   | CH <sub>2</sub> | 3.4  | -  | -  |
| <b>126d</b>          | H   | H                  | - | -   | CH <sub>2</sub> | 5.8  | -  | -  |
| <b>126e</b>          | OH  | H                  | - | -   | S               | 5.8  | -  | -  |
| <b>126f</b>          | H   | H                  | - | -   | S               | 5.9  | -  | -  |
| <b>126g</b>          | H   | H                  | - | -   | CHMe            | 8.2  | -  | -  |
| <b>126h</b>          | H   | H                  | - | -   | NH              | 12.7 | -  | -  |
| <b>126i</b>          | H   | OH                 | - | -   | S               | 48.0 | -  | -  |
| <b>126j</b>          | H   | H                  | - | -   | C=O             | >100 | -  | -  |
| rucinol ( <b>9</b> ) |     |                    |   |     |                 | 8.3  | -  | -  |
